# Supplementary material for: RiPP enzyme heterocomplex structure-guided discovery of a bacterial borosin α-N-methylated peptide natural product
Source: Royal Society of Chemistry journal article supplement (doi:10.1039/d3cb00093a), 2023-01-01
Supplement: d3cb00093a1.pdf [file d3cb00093a1.pdf]

## Supplementary Information for

RiPP enzyme heterocomplex structure-guided discovery of a bacterial borosin  $\alpha$ -*N*-methylated peptide natural product

K. K. Crone,<sup>‡</sup><sup>a</sup> T. Jomori,<sup>‡</sup><sup>b</sup> F. S. Miller,<sup>a</sup> J. A. Gralnick,<sup>bc</sup> M. H. Elias<sup>ab</sup> and M. F. Freeman<sup>\*ab</sup>

<sup>a</sup>Department of Biochemistry, Molecular Biology, and Biophysics, University of Minnesota - Twin Cities, St. Paul 55108, USA.

<sup>b</sup>BioTechnology Institute, University of Minnesota - Twin Cities, St. Paul 55108, USA.

<sup>c</sup>Department of Plant and Microbial Biology, University of Minnesota - Twin Cities, St. Paul 55108, USA.

\* Corresponding author, e-mail: mffreema@umn.edu

‡ These authors contributed equally to this work.

§ Current address: Department of Chemistry, Biology and Marine Science, University of the Ryukyus, Okinawa 903-0213, Japan.

## Table of Contents

|                                                                                                                                                                   |    |
|-------------------------------------------------------------------------------------------------------------------------------------------------------------------|----|
| Table S1  All primers, plasmids, and genes used in this manuscript. ....                                                                                          | 3  |
| Table S2  Crystallographic data and statistics. ....                                                                                                              | 11 |
| Table S3  Bismethylated SonA core peptide masses searched for (a) and identified (b) in the LC-MS/MS data from 24 hour cultures of wt <i>S. oneidensis</i> . .... | 12 |
| Figure S1  Mass spectrometric analysis of SonA variants. ....                                                                                                     | 13 |
| Figure S2  SonM—SonA_Q60-Y62del—SAH structure.....                                                                                                                | 34 |
| Figure S3  ICP-OES analysis for SonM+SonA_Q60-Y62del. ....                                                                                                        | 35 |
| Figure S4  SO1059 activity with alanine- <i>p</i> -nitroaniline.....                                                                                              | 36 |
| Figure S5  Mass spectrometric analysis of SO1059 activity with trypsinized SonA-2Me.....                                                                          | 37 |
| Figure S6  Reverse transcription PCR for verification of native transcription conditions of <i>sonA</i> . ....                                                    | 40 |
| Figure S7  Mass spectrometric identification of the SonA core peptide. ....                                                                                       | 41 |
| Figure S8  Retention time and mass spectrometric analysis of <b>1</b> , heterologously produced in <i>E. coli</i> . ....                                          | 44 |
| Figure S9  NMR peak table and spectra of <b>1</b> .....                                                                                                           | 46 |
| Figure S10  Extracted ion chromatogram for Marfey's analysis of <b>1</b> . ....                                                                                   | 52 |
| Figure S11  Biological activity testing of <b>1</b> . ....                                                                                                        | 53 |

**Table S1| All primers, plasmids, and genes used in this manuscript.****a. Primers used in this study**

| <b>ID</b> | <b>Description</b>    | <b>Sequence (5'-3')</b>                                         |
|-----------|-----------------------|-----------------------------------------------------------------|
| prKKC1035 | His-SonA_extBBD_fwd   | AAAACGTTAAAAACGTTAAGTGG                                         |
| prKKC1036 | His-SonA_modBBD_rev   | GAGCTTTTCCATATCCC                                               |
| prKKC1037 | His-SonA_lessBBD_fwd  | AGTGGTGATAGTAGCTATC                                             |
| prKKC1041 | SonA_KTLSdel_for      | GGTGATAGTAGCTATCAATC                                            |
| prKKC1042 | SonA_MEKCLKLdel_rev   | ATCCCCAGTCATTACAG                                               |
| prKKC1043 | SonA_KTLGDSdel_for    | AGCTATCAATCTTACCTTG                                             |
| prKKC1044 | SonA_KTLSext_for      | AGTAAAACGTTAAGTGGTGATAGTAGCT                                    |
| prKKC1045 | SonA_MEKCLKLText_for  | ATGGAAAAGCTCAAACGTTAAGTGGTG                                     |
| prKKC1046 | SonA_KTLSext_rev      | TAACGTTTTGAGCTTTTCCATATCCCC                                     |
| prKKC1047 | SonA_QSYdel_for       | CTTGTTATTTACATGGTAATG                                           |
| prKKC1048 | SonA_QSYdel_rev2      | ATAGCTACTATCACCACTTAAC                                          |
| prKKC1005 | pET28b_bb_rev_signal  | CATGGTATATCTCCTTCTTAAAGTTAAACA                                  |
| prKKC1003 | pET28b_bb_fw_signal   | TGAGATCCGGCTGCTAACAAA                                           |
| prKKC1000 | Son_1059_Nsec1_fw     | CTGGCGCTGGCTGGTTTAGTTTTAGCGTTTAGCGCATCG<br>GCGGCCGTCCAAAATCCTTT |
| prKKC1002 | Son_1059_C-histag_rev | ATGGTGATGGTGATGGTGCCGCTGCCATGGGTCATTTT<br>ATTTTTAATTAGTACGC     |
| prKKC1004 | insert_gib_Nsec_fw    | TGTTTAACTTTAAGAAGGAGATATACCATGAAAAAGATTT<br>GGCTGGCGCTGGCTGGTTT |
| prKKC1001 | insert_gib_Nsec_rev   | TTTGTTAGCAGCCGGATCTCAatggtgatggtgatggtgGCC                      |
| prTJ1042  | SO0867_FGib           | tcaCATATGAAAGATGCCCTGTCTATG                                     |
| prTJ1043  | SO0867_RGib           | ATTCGGATCCCGtgactggaagtacagtccctcGAACTGCGCGAC<br>AAC            |
| prTJ1044  | pET_SO0867_FGib       | agtcaCGGGATCCGAATTCGAGCTCCGTC                                   |
| prTJ1045  | pET_SO0867_RGib       | GGCATCTTTCATATGtgactggaagtacagtccc                              |
| prTJ1054  | SonA_Xacore_F         | ggaAGGGATAGTAGCTATCAATCTTACC                                    |
| prTJ1055  | SonA_Xacore_R         | ctcgatACCACTTAACGTTTTGAGCTT                                     |
| prFM1144  | pBAD_seq_fw           | CCTACCTGACGCTTTTTATCGCAA                                        |
| prFM1145  | pBAD_seq_rev          | GCGTTCTGATTTAATCTGTATCAGGCT                                     |
| prFM1150  | SonCluster_screen_fw  | GTGCGCCAAAGCAATATGGTGAGTT                                       |
| prFM1151  | SonCluster_screen_rev | GCGCTATGACTTCCAAATCGGCAAT                                       |
| prFM1152  | 1479US_fw             | CCCGGGGGATCCACTAGTGCTACAATAGGGGTAAAG                            |
| prFM1155  | 1479DS_rev            | GAACAAAAGCTGGAGCTCAAATCAGTTGATTATAATGCT                         |
| prFM1167  | pSMV3_bb_rev          | ACTAGTGGATCCCCCGG                                               |
| prFM1168  | pSMV3_bb_fw           | GAGCTCCAGCTTTTGTTCCC                                            |

|            |                    |                                                             |
|------------|--------------------|-------------------------------------------------------------|
| prFM1180   | ΔSO1478_US_seq_rev | GCGAGCATTACCCATAAAGAAC                                      |
| prFM1181   | ΔSO1478_DS_seq_fw  | CGTGCGTCTTACTTACGTTTA                                       |
| prFM1182   | ΔSO1479_US_seq_rev | CGGCATGTTCAATATAGCTGC                                       |
| prFM1183   | ΔSO1479_DS_seq_fw  | GAGCTGGAGATTAATAGCGTACA                                     |
| prFM1196   | SO1479USnewREV     | CTTCAATTAATCACCATTACCATGTGAAATTCCAGACAT<br>GTTTTCTCCTTATTG  |
| prFM1197   | SO1479DSnewFW      | CAATAAGGAGAAAACATGTCTGGAATTTACATGGTAAT<br>GGTGATTAATTG      |
| prFM1216   | pBBAD_gib_rev      | CGCTAGCCCCAAAAAACGGG                                        |
| prFM1217   | pBBAD_gib_fw       | CCTGCAGGCATGCAAGC                                           |
| prFM1218   | SO1478UF-Spel      | TAGAACTAGTACAAAAAGCGCCATTGGC                                |
| prFM1219   | SO1478UR-XhoI      | TAGACTCGAGCACACAGACGAGTGATCCC                               |
| prFM1220   | SO1478DF-XhoI      | TAGACTCGAGATTGAAGTGTGTTATTGAATCATTATTAAC<br>AATAAGG         |
| prFM1221   | SO1478DR-SacI      | TAGAGAGCTCAGAGAATCTAATAAGTAAGAGATAGCAAG<br>CTG              |
| M13F       | Universal primer   | GTAAAACGACGGCCAGT                                           |
| M13R       | Universal primer   | GGAAACAGCTATGACCATG                                         |
| prmMRJ_026 | sonA_fwd           | ATGTCTGGATTATCGGATTTTTTTTACCCAGTTAGGCCAA<br>GATG            |
| prmMRJ_027 | sonA_rev           | TTAATCACCATTACCATGTGAAATAACAAGGTAAGATTG<br>ATAGCTACTATCACCA |
| prmMRJ_024 | sonM_fwd           | TTGGGATCACTCGTCTGTGTGGGCACT                                 |
| prmMRJ_025 | sonM_rev           | TTATCCCAAATCTTCGGGACCGATCCCTAAGTTAGC                        |

#### b. Plasmids used in this study

| ID      | Description                          |
|---------|--------------------------------------|
| pMF1181 | SonM-gRBS-His-SonA_pET28b            |
| pMF1235 | His-SonA_pET28b                      |
| pMF1236 | His-SonM_pET28b                      |
| pMF1230 | His-ADE (JW_3640 ASKA collection)    |
| pMF1231 | His-SAHN (JW_0155 ASKA collection)   |
| pMF1321 | His-SonA_K51-L53dup_pET28b           |
| pMF1322 | His-SonA_K51-L53del_pET28b           |
| pMF1397 | His-SonA_Q60-Y62del_pET28b           |
| pMF1398 | His-SonA_K51-S54del_pET28b           |
| pMF1399 | His-SonA_M47-L53del_pET28b           |
| pMF1400 | His-SonA_K51-S57del_pET28b           |
| pMF1403 | His-SonA_K51-S54dup_pET28b           |
| pMF1404 | His-SonA_M47-L53dup_pET28b           |
| pMF1440 | SonM-gRBS_His-SonA_Q60-Y62del_pET28b |
| pMF1488 | pET28b-ss-strep-tev-SO0867-tev-His   |
| pMF1246 | His-So_1059_ecoli_sig_pET28b         |
| pMF1490 | SonNMT-gRBS-His-SonA_XaCORE55-56     |
| p015    | pBBad18K                             |
| p024    | pSMV3                                |
| pMF1274 | SO1478-79_pBBAD18K                   |
| pMF1223 | KOso1478_pSMV3                       |

**c. DNA sequences**

| UniProt ID                                                                                                                                                                                                                                                                                                                                                                                                                                                                                                                                                                                                                                                                                                                                                                                                                                                                                                                                                                                                                                                                                                                                                                                                                                                                                                                                                                                                                                                                                                                                                                                                                                                                                                                                                                                                                                                                                                                                                                                               | Name                 | Description                         |
|----------------------------------------------------------------------------------------------------------------------------------------------------------------------------------------------------------------------------------------------------------------------------------------------------------------------------------------------------------------------------------------------------------------------------------------------------------------------------------------------------------------------------------------------------------------------------------------------------------------------------------------------------------------------------------------------------------------------------------------------------------------------------------------------------------------------------------------------------------------------------------------------------------------------------------------------------------------------------------------------------------------------------------------------------------------------------------------------------------------------------------------------------------------------------------------------------------------------------------------------------------------------------------------------------------------------------------------------------------------------------------------------------------------------------------------------------------------------------------------------------------------------------------------------------------------------------------------------------------------------------------------------------------------------------------------------------------------------------------------------------------------------------------------------------------------------------------------------------------------------------------------------------------------------------------------------------------------------------------------------------------|----------------------|-------------------------------------|
| P31441                                                                                                                                                                                                                                                                                                                                                                                                                                                                                                                                                                                                                                                                                                                                                                                                                                                                                                                                                                                                                                                                                                                                                                                                                                                                                                                                                                                                                                                                                                                                                                                                                                                                                                                                                                                                                                                                                                                                                                                                   | <i>ade</i>           | Adenine deaminase                   |
| <p>ATGAATAATTCTATTAACCATAAATTTTCATCACATTAGCCGGGCTGAATACCAGGAATTGTTAGC<br/> CGTTTTCCCGTGGCGACGCTGTTGCCGATTATATTATTGATAATGTCTCTATTCTCGACCTGATCA<br/> ATGGCGGAGAAATTTCCGGCCCAATTGTGATTAAGGACGTTACATTGCCGGTGTGGCGCAG<br/> AATACACTGATGCTCCGGCTTTGCAGCGGATTGATGCTCGCGGCGCAACGGCGGTGCCAGGG<br/> TTTATTGATGCTCACCTGCATATTGAATCCAGCATGATGACGCCGGTCACTTTTCAAACCGCTAC<br/> CCTGCCGCGCGGCCTGACGACCGTTATTTGCGACCCTCATGAAATCGTCAACGTGATGGGCGA<br/> AGCCGGATTGCGCTGGTTTGCCCGCTGTGCCGAACAGGCAAGGCAAACCAGTACTTACAGGT<br/> CAGCTCTTGCGTACCCGCCCTGGAAGGCTGCGATGTTAACGGTGCCAGTTTTACCCTTGAACA<br/> GATGCTCGCCTGGCGGGACCATCCGCAGGTTACCGGCCTTGAGAAATGATGGACTACCCTG<br/> GCGTAATTAGCGGGCAGAATGCGCTGCTCGATAAACTGGATGCATTTGCCACCTGACGCTGG<br/> ACGGTCACTGCCCGGTTTGGTGGTAAAGAAGTAAACGCCTATATTACTGCGGGTATTGAAAA<br/> CTGCCACGAAAGTTATCAGCTGGAAGAAGGACGCCGAAATTACAACCTCGGCATGTCGTTGAT<br/> GATCCGCGAAGGGTCCGCTGCCCGCAATCTCAACGCGCTGGCACCGTTGATCAACGAATTTAA<br/> CAGCCCGCAATGCATGCTCTGTACCGATGACCGTAACCCGTGGGAGATCGCCATGAAGGACA<br/> CATCGATGCCTTAATTCGCCGCTGATCGAACAACACAATGTGCCGCTGCATGTGGCATATCGC<br/> GTCGCCAGCTGGTCGACGGCGCGCCACTTTGGTCTGAATCACCTCGGCTTACTGGCACCCGG<br/> CAAGCAGGCCGATATCGTCCTGTTGAGCGATGCGCGTAAGGTCACGGTGCAGCAGGTACTGGT<br/> GAAAGGCGAGCCGATTGATGCGCAAACCTTACAGGCGGAAGAGTGGCGGAGACTGGCACAAT<br/> CCGCTCCGCCATATGGCAACACCATTGCCCGCCAGCCAGTTTCCGCCAGCGACTTTGCCCTGC<br/> AATTTACGCCCGGAAAACGCTATCGGGTCATTGACGTCATCCATAACGAATTGATTACGCACTC<br/> CCTACTCCAGCGTCTACAGCGAAAATGGTTTTGATCGCGATGATGTGAGCTTTATTGCCGTACTT<br/> GAGCGTTACGGGCAACGGCTGGCTCCGGCTTGTGGTTTGTGTTGGCGGCTTTGGACTGAATGAA<br/> GGTGCCTGGCTGCGACGGTACGCCATGACAGCCATAATATTGTGGTGCATCGGTGCGAGTGCC<br/> GAAGAGATGGCGCTGGCGGTCAATCAGGTGATTGAGGATGGCGGCGGGCTGTGCGTGGTACG<br/> TAACGGCCAGGTACAAAGTCATCTGCCGTTACCCATTGCCGGGCTGATGAGCACCGACACGGC<br/> GCAGTCGCTGGCGGAACAAATTGACGCCTTGAAGCCGCCGCCCGTGAATGCGGTCCGTTAC<br/> CCGATGAGCCGTTTATTGAGATGGCGTTTCTTTCTCTGCCAGTGATCCCCGCGCTAAAATAAC<br/> CAGTCAGGGGCTATTTGATGGCGAGAAGTTTGCTTCACTACGCTGGAAGTCACGGAATAA</p> |                      |                                     |
| P0AF12                                                                                                                                                                                                                                                                                                                                                                                                                                                                                                                                                                                                                                                                                                                                                                                                                                                                                                                                                                                                                                                                                                                                                                                                                                                                                                                                                                                                                                                                                                                                                                                                                                                                                                                                                                                                                                                                                                                                                                                                   | <i>sahn</i>          | S-adenosylhomocysteine nucleosidase |
| <p>ATGAAAATCGGCATCATTGGTGAATGGAAGAAGAAGTTACGCTGCTGCGTGACAAAATCGAAA<br/> ACCGTCAAACATCAGTCTCGGCGGTTGCGAAATCTATACCGGCCAACTGAATGGAACCGAGG<br/> TTGCGCTTCTGAAATCGGGCATCGGTAAGTTCGCTGCGGCGCTGGGTGCCACTTTGCTGTTGG<br/> AACACTGCAAGCATGTGATTATTAACACCGGTTCTGCCGGTGGCCTGGCACCAACGTTGA<br/> AAGTGGCGATATCGTTGTCTCGGACGAAACGACGTTATCACGACGCGGATGTGACGGCATTG<br/> GTTATGAATACGGTCAGTTACAGGCTGTCCGGCAGGCTTTAAAGCTGACGATAAACTGATCGC<br/> TGCCGCTGAGGCCTGCATTGCCGAACGAACTTAAACGCTGTACGTGGCCTGATTGTTAGCGG<br/> CGACGCTTTCATCAACGGTCTGTTGGTCTGGCGAAAATCCGCCACAACCTTCCACAGGCCATT<br/> GCTGTAGAGATGGAAGCGACGGCAATCGCCATGTCTGCCACAATTTCAACGTCCCGTTTGTG<br/> GTCGTACGCGCCATCTCCGACGTGGCCGATCAACAGTCTCATCTTAGCTTCGATGAGTTCTG<br/> GCTGTTGCCGCTAACAGTCCAGCCTGATGGTTGAGTCACTGGTGCAGAACTTGCACATGGC<br/> TAA</p>                                                                                                                                                                                                                                                                                                                                                                                                                                                                                                                                                                                                                                                                                                                                                                                                                                                                                                                                                                                                                                                                                                                                                                                                                  |                      |                                     |
| Q8EGW3                                                                                                                                                                                                                                                                                                                                                                                                                                                                                                                                                                                                                                                                                                                                                                                                                                                                                                                                                                                                                                                                                                                                                                                                                                                                                                                                                                                                                                                                                                                                                                                                                                                                                                                                                                                                                                                                                                                                                                                                   | <i>sonM (so1478)</i> | Borosin methyltransferase           |
| <p>ATGGGATCACTCGTCTGTGTGGGCACTGGGTTACAGCTCGCGGGGCAAATTAGCGTATTAAGC<br/> CGCAGCTATATTGAACATGCCGATATTGATTTTCACTCTTACCTGACGGTTTCTCGCAGCGTTG<br/> GTTGACGAAGCTCAACCCCAATGTCATCAATTTGCAGCAGTTTTATGCGCAAAATGGTGAAGTT<br/> AAAAATCGCCGAGACACCTACGAGCAAATGGTCAATGCCATTCTAGATGCGGTGAGAGCGGGT<br/> AAAAAAACCGTGTGTGCACTCTACGGTCATCCGGGGGATTTGCCTGTGTATCCCATATGGCGA<br/> TAACTCGGGCGAAGGCCGAAGGGTTTTCGGCAAAGATGGAGCCGGGGATTTCCGGCCGAAGCT<br/> TGCCGTGTTGGGCGACTTAGGGATTGACCCCGGCAACTCGGGGCATCAAAGTTTTGAAGCTAGC<br/> CAGTTTATGTTTTTCAACCATGTGCCCGATCCCACTACCCACTTATTACTCTGGCAAATCGCCAT</p>                                                                                                                                                                                                                                                                                                                                                                                                                                                                                                                                                                                                                                                                                                                                                                                                                                                                                                                                                                                                                                                                                                                                                                                                                                                                                                                                                                                                                           |                      |                                     |

TGCAGGCGAACATACCTTAACCCAATTTTCATACCTCGAGTGATAGGTTGCAGATCCTCGTGGAG  
 CAGTTGAATCAATGGTATCCCCTCGACCATGAGGTGGTACATACGAAGCGGCCAATTTGCCAA  
 TCCAAGCCCCGCGTATCGAGCGTTTACCTTTAGCGAATTTACCCCAAGCACACTTAATGCCGAT  
 TAGTACGTTGTTAATTCCGCCAGCAAAAAAGCTGGAGTACAACATGCTATTTTGGCTAAGTTAG  
 GGATCGGTCCCGAAGATTTGGGATAA

|        |                      |                        |
|--------|----------------------|------------------------|
| Q8EGW2 | <i>sonA (so1479)</i> | Borosin RiPP precursor |
|--------|----------------------|------------------------|

ATGTCTGGATTATCGGATTTTTTTACCCAGTTAGGCCAAGATGCGCAGTTAATGGAAGACTATAA  
 ACAGAATCCTGAGGCGGTGATGCGTGCCACGGATTAAGTATGAAACAAATTAACGCTGTAATG  
 ACTGGGGATATGGAAGAGCTCAAACGTTAAGTGGTATAGTAGCTATCAATCTTACCTGTTAT  
 TTCACATGGTAATGGTGATTAA

|        |               |                |
|--------|---------------|----------------|
| Q8EHZ5 | <i>so1059</i> | Aminopeptidase |
|--------|---------------|----------------|

GTGAATTTGTTTAAAGCTAGCCTAGTCGCCCTCACCTGCTCAGCATTAAATGTCGTGCGCCGTCC  
 AAAATCCTTTAAATACAGGACCAAGGGATACGAGTCCCTATATCAGCCAGTATCAGGCAAGTTT  
 GCGTTCACAGGTGATATCGAATGTACATTATGAGTTGGATTTTCAACTGACTGGCGATACCGAA  
 TTCAGTGCGACAACGAAAGTGAACCTTCAATTTAAGCGAAGTGCCCAAGCAACTGAGCTTAGATC  
 TCAACAAAGCACAAATTAAGCGCTTTTTGATCAACGGCACCGCCGTTTATCCTAATTACAATGGC  
 GCCTATATCAGCCTCAACACTCGTTACTGACTTCAGGGGAAACACAATTGAAGTGCAATTCA  
 CCCGAGCCACAGTACCAATGGTGAAGTTTTGCACCGGTTCCAAGACCCAGTTGATGGCAAGG  
 TTTACCTTTACTCCCATTTTGAACCTGCCGCCGCCAACAATGTTTGCAGGATTTGATCAACCC  
 GACTTGAAGGCCAATTATAAAATCAGCGTAACTGCACCTAGGGATTGGCAAGTTATCAGTACGA  
 CCCGTGAAACGACCGTCACCCAGCTGGCGCCTTAAATCGTTGGGAGTTTCTGAAACGCCTA  
 AGTTAAGCCCTTATAACTTCTCCATGCATGCTGGCCCATATTATATGTGGCAGGATAATTCTGGC  
 CGTTATCCAATGCGCTTATTCGCACGGCAATCCGTTGCCAGCCAAGTGAATCCACAGGACTGGT  
 TTACCTACACCAACAAGGGTTAACCTTCTTTGACGCCTACTTTGGTATTCCTTACCCCTTTAAA  
 AAATATGATCAGATCCTCGTGCCTGATTTTCTCTACGGCGCGATGGAAACGCAGGAGCAGTGA  
 CCTTCGCCGAAGATCACTTCTCCACAAGCGGAAATGACCGCCGAGCAAAAACAAAACCTTAGC  
 GGGCGTAATTATGCACGAAATGGCCACCAATGGTTTGGCGATCTGGTGACCATGAAGTGGTG  
 GAACAGCCTCTGGTTAAACGAAAGTTTTGCTTCTTTATGGGTACACTTGCAACCCAAGAAGCC  
 ACTGAATTTACCAATGCATGGCGCAGTTTTTATGCTCAAGGTAACAACGTGCCTATGAGCAAG  
 ACAGCTTAGTGACCACTCATCCATTGAAGTACCCGTGGCAACAACCCAAAATGCCTTCGATAA  
 TATCGATGCCATTACCTATCAAAAAGGCGCCTCAACCCTCAAACAACACTACGCCATTTACTCGGT  
 GATGTGGTGTTCGCGCGGGCGTGAGCAACTACCTCAAACAATATAGTTATCAAAATGCCGAGC  
 TAGATGACTTCATCAATAGCCTCGCCAAAGCCTCGAATCGTGACTTAAGCGCATGGACGCAGGA  
 ATGGCTTTACAGCGCAGGGGTAACACGATCAAGGCAGAGTACCGCTGCGACGGTAACCGCAT  
 CAGCGAATTTAGCCTACTGCAATATCCTGCCAGCAGCGAACTGCCAACACTTAGGGAGCAAAAA  
 GTCCAAATCGCGCTCTTCAAAAAGGACGTTTCGATTTACGACATGAGACCACAGTGCCAGTCA  
 CCTACAAAGGTGAGCGCACGGAAGTGAAGCAATTAGTCGGTGAGCGTTGCCAGATCTGGTTT  
 ACCCTAACTACGATGACTGGGGCTATGTAAAGGTACAACCTCGATGACAAATCCTTTGATACCGC  
 CAAGCAACAGTAAAGCAAGGTGACAGACCCGCTTCTGCGTTCAATGTTATGGCAAAGCCTGTG  
 GGACAGTGTGCGTGAGGGCAACCTGAGTTTGGACCAATACCTGAGCACAGTGTTTATTAATGCA  
 CCAGCAGAAAATGACTACACAGTCTGCGCCAAATTTCAAGCCTGCTACGCGTAAGCGT  
 ACCTTGCAGCAATCGACCAATCCAGCAAAACTATGCTGAAAATGCAGTAAAAGGCTTAGCACA  
 AATGAGCCTTCGAAAACCATGGAGAGTAGAGGCAACAATGACTTCCAGCGCCGCTGGTTTAA  
 GCCTATATTCAATTAGCGGGCGATCGCGACAGTTTACGCCACTTAGCACAATTAAGTATGGCA  
 CAACCAAAATCAAAGGGTTAACCTTAGATCAAGATCTGCGCTGGGCTATCATAACTCAGCTCAA  
 TCGCTACGACTTCCCAATGCGCAGCAACGTATTACACGGGAAAGCGCACGCGATAACTCAGA  
 TTCAGGGGAAAAGTCTGCATTAGCTGCACAGGTTATCCGCCAGAAGCCGCGGCGAAGCGTGC  
 TTGGTTAAGTAAGGTGCATACCGATGCACTGCCCTTTGCAAAACAGCGCATTATCATGGAAAAC  
 CTTTATCCTGCTGAGCAAAAGCTCTTAAGTGCGGCCACCGCCGAAGAGCGCCTCGAAACTTA  
 GCAGACATGGATAAAAAAGGCCCGGTGTTTATGCGTAGCTACAGCCGCACTCTTATTCCAACCG  
 ATTGTAACACTACAACAGTATTGCGGCCCTTAGATAAAGTATTAGACAGCCAACAGGCTTATCTAAT  
 CTTAGCCGTGCAACCTTATTAGAAACGCGCCAAGCCGAGCAGCGCTGCGTACTAATTAATAA  
 AAATGACCCATTGA

|        |               |                                |
|--------|---------------|--------------------------------|
| Q8EIH2 | <i>so0867</i> | Collagenolytic serine protease |
|--------|---------------|--------------------------------|

ATGTGATAAAACTCTCACCGTTGGCGTTAGCAATTACAGGAGCTATGACGTTGTGACCCGTAC  
 CGGCTATGGCAAAGATGCCCTGTCTATGAAAAGATGCCATTCTCGTGGTGTATAAAGACAA  
 TGCAACTAAAGCAGAGCGCTCGGCGGCTCAGCGTTAATTCGTGGAACATTAACCGATGTCAAT

GCCGATGGTGTGCGACGATAAATTTCCGCATTTACTTAAACGGCAAGCTGGCCCGTTTAGCATTGC  
 GTAAAGGCGCCAATATTGAAGATGCCATTAAGGTGATCAGCCGTCATCCTGCGGTGAAATACGC  
 TGAGCCTAACTATATTATCAAAGCGATAGGTACACCTGATGACCCAAGTTTTGCCAGCCTATGG  
 GGAATGAATAACACTGGCCAAAGCGGTGGCACTGCCGATGCGGATATCGATGCACCTGAAGCT  
 TGGGAAATCACCACAGGTAGCTCTGATGTGGTATTGGCGTTATCGATACCGGTGTGGATTACA  
 ACCATCCCGATTTGCAAGCCAATATGTGGTCAATGCGGGCGAAATTGCGGGCAATGGCATCG  
 ATGATGACGCAAACGGTGTATCGACGATATTCATGGTTACAGTGCCGTGAATAATAACGGAAA  
 TCCAATGGACGGAAACGGCCACGGTACCCATGTTTCTGGCACGATTGGCGCTAAAGGTAATAA  
 CGGTGTCGGTGTAGTAGGCGTTAACTGGGACGTTAAAATTGCCGGATGTCAGTTCCTCGATACT  
 GACGGTTATGGCTCTACCGCGGGCGCTATTGCGTGTATCGATTATTTACCAACCTTAAGGTTA  
 ATCATGGGGTTGATATTAAGCGACCAACAACCTTTGGGGCGGTGGCGGCTTTAGTCAAGCATT  
 AAAAGATGCAATTGAAGCGGGTGGTGAAGCAGGGATTTTATTTGTTGCCGCAGCAGGAAACGA  
 TGCCGTCGATAATGATGCGAGCCCACACTATCCTTCAAGCTATAACTCTGATGTGGTGTCTCC  
 ATTGCCAGTACAACTCGCAATGACCGTATGTCAGACTTCTACAATGGGGTTTAAACCAGTGTTG  
 ATATGGGCGCGCCAGGCTCGGCGATTTTATCAACTGTCCGTGGCGGTGGTTACGCGACTTACT  
 CTGGTACCTCGATGGCAACTCCCACGTGACGGGCGCCGCGCTCTCGTTTGGGCATTAACC  
 CTGACTTAACACCTGTTGAAATGAAAGAACTACTGATGGCCTCAGGTGATGCGAATGCGGATTT  
 AACCGGTAACAGGTTGCGGGTACTCGCCTCAATGTGGCTAATGCGCTGGAGCAGGCAAACCC  
 ATCACCTAGCTATAAGTTACCGTATCACCGGCTTACAATCTGTGCAAGCAGGCAGCGCTGCA  
 AGCTATAACTTCAGTGTGGCAGTGTGGCAGGTTGGGATGGTGTGTCGCATTGACTGTCAGC  
 GTGTCACCTGCACTTGAAGGGGTTTCAATTATCAAGTTCAACCGTTTCTGCGGGTGGTTCATTTA  
 CCTTAAACGTGGCGACAACCGCGCAAACGGTTTGGGGTATTACAGCATTACGGTGACGGGCA  
 ATGATGGTGCATTGAAAAGTCTAAAAGTCGTGTCGCTTAATGTCTTCCACAAGGATTAACGA  
 CTTTACCTATGGTAATGAGAACTCTGTAGCCATTCCGGATAACAACCCTAATGGCGTTATTAGCA  
 CAATAGAAGTCGCCGACGATGTACAGATTTTTGGTGTGCTCGCTGACGTGAATATCAGTCACAC  
 TTGGATTGGTACTTACGCGTTGTGCTAACCTCACCAGCGGGTACTCAAGTGGTGTACATAAC  
 CGCGATGGTGGCAGTGCTGATAATATCGTTAAGAGCTGGGATCTAAGCGCATTGATGGTGAA  
 AATGTACGTGGTACTTGGTCAATTATCTGTCGATGACAATGTGGGTTGAGATACCGGAACGCTTA  
 ATAACTGGGGCTTAGTCATCAGCGGCTTAGGTGAGGCTTCCCAGCTGCGCCTGTTGCAGGTT  
 TTGAGTTTCCGTTGAAGGATTAGGCGTAGCCTTACCAACACCAGTACAGATGCAAATGATGA  
 TATCGTCAGTTACAGCTGGGACTTTGGTGTGATGGTACAACTCTACTGAGATGAACCAAGCCAT  
 GTTTATACCTCTGCGGGTACTTATACTGTGCTTTGACTGTGACCGATTCAATGGATCACAGCAA  
 CACTGTGACGATGCCTGTACAAGTCTATGAGCATAATATTAATGCTGCTGTTAGCCGCGCATT  
 GTATCGCGCCGTGGCAGTGCAATGGTAGATCTCACTTGGGATAGTGCTTTAGGTGAAAACGTT  
 GCCCTTACCAGGATGGTGAAGTGGTGGTAACGACTGAGAACGATGGTAGCTATCGTGATCGC  
 TTTACGACCACCGCCTCAAGTGTGACTTATCAAGTGTGTGAAACGACAGGAACATTATGTTCTG  
 CGCCAGTTGTCGCGCAGTTCTAA

|     |                  |                                                                            |
|-----|------------------|----------------------------------------------------------------------------|
| n/a | <i>his6-sonM</i> | Hexahistidine-tagged borosin methyltransferase for heterologous expression |
|-----|------------------|----------------------------------------------------------------------------|

ATGCATCATCATCATCACAGCAGCATGGGATCACTCGTCTGTGTGGGCACTGGGTTACAGC  
 TCGCGGGGCAAATTAGCGTATTAAGCCGAGCTATATTGAACATGCCGATATTGATTTTCACTC  
 TTACCTGACGGTTTCTCGCAGCGTTGGTTGACGAAGCTCAACCCCAATGTCATCAATTTGCAGC  
 AGTTTTATGCGCAAATGGTGAAGTTAAAAATCGCCGAGACACCTACGAGCAAATGGTCAATGC  
 CATTCTAGATGCGGTGAGAGCGGGTAAAAAACCGTGTGTGCACTCTACGGTCATCCGGGGGT  
 ATTTGCCTGTGTATCCCATATGGCGATAACTCGGGCGAAGGCCGAAGGGTTTTCGGCAAAGAT  
 GGAGCCGGGATTTCCGGCCGAAGCTTGCTGTGGGCGGACTTAGGGATTGACCCCGGCAACT  
 CGGGGCATCAAAGTTTTGAAGCTAGCCAGTTTATGTTTTTCAACCATGTGCCGATCCCCTAC  
 CCACTTACTCTGGCAAATCGCCATTGCAGGCGAACATACCTTAACCAATTTCATACCTCGA  
 GTGATAGGTTGCAGATCCTCGTGGAGCAGTTGAATCAATGGTATCCCCTCGACCATGAGGTGG  
 TCATATACGAAGCGGCCAATTTGCCAATCCAAGCCCCGCGTATCGAGCGTTTACCTTTAGCGAA  
 TTTACCCCAAGCACACTTAATGCCGATTAGTACGTTGTTAATTCGCCAGCAAAAAAGCTGGAG  
 TACAATATGCTATTTTGGCTAAGTTAGGGATCGGTCCCGAAGATTTGGGATAA

|     |                  |                                                                    |
|-----|------------------|--------------------------------------------------------------------|
| n/a | <i>his6-sonA</i> | Hexahistidine-tagged borosin precursor for heterologous expression |
|-----|------------------|--------------------------------------------------------------------|

ATGCATCATCATCATCATCATGCTGATTATCGGATTTTTTTACCCAGTTAGGCCAAGATGC  
 GCAGTTAATGGAAGACTATAAACAGAATCCTGAGGCGGTGATGCGTGCCACGGATTAAGTAT  
 GAACAAATTAACGCTGTAATGACTGGGGATATGAAAAGCTCAAACGTTAAGTGGTGTAGTA  
 GCTATCAATCTTACCTGTTATTTACATGGTAATGGTGATTAA

|                                                                                                                                                                                                                                                                             |                              |                                                                            |
|-----------------------------------------------------------------------------------------------------------------------------------------------------------------------------------------------------------------------------------------------------------------------------|------------------------------|----------------------------------------------------------------------------|
| n/a                                                                                                                                                                                                                                                                         | <i>his6-sonA_Q60-Y62del</i>  | Hexahistidine-tagged borosin precursor variant for heterologous expression |
| ATGCATCATCATCATCACATGTCTGGATTATCGGATTTTTTTACCCAGTTAGGCCAAGATGC<br>GCAGTTAATGGAAGACTATAAACAGAATCCTGAGGCGGTGATGCGTGCCACGGATTAAGTATGAT<br>GAACAAATTAACGCTGTAATGACTGGGGATATGGAAAAGCTCAAACGTTAAGTGGTGATAGTA<br>GCTATCTTGTATTTCACATGGTAATGGTGATTAA                                |                              |                                                                            |
| n/a                                                                                                                                                                                                                                                                         | <i>his6-sonA_K51-S54del</i>  | Hexahistidine-tagged borosin precursor variant for heterologous expression |
| ATGCATCATCATCATCACATGTCTGGATTATCGGATTTTTTTACCCAGTTAGGCCAAGATGC<br>GCAGTTAATGGAAGACTATAAACAGAATCCTGAGGCGGTGATGCGTGCCACGGATTAAGTATGAT<br>GAACAAATTAACGCTGTAATGACTGGGGATATGGAAAAGCTCGGTGATAGTAGCTATCAATCTT<br>ACCTTGTTATTTCACATGGTAATGGTGATTAA                                 |                              |                                                                            |
| n/a                                                                                                                                                                                                                                                                         | <i>his6-sonA_K51-L53del</i>  | Hexahistidine-tagged borosin precursor variant for heterologous expression |
| ATGCATCATCATCATCACATGTCTGGATTATCGGATTTTTTTACCCAGTTAGGCCAAGATGC<br>GCAGTTAATGGAAGACTATAAACAGAATCCTGAGGCGGTGATGCGTGCCACGGATTAAGTATGAT<br>GAACAAATTAACGCTGTAATGACTGGGGATATGGAAAAGCTCAGTGGTGATAGTAGCTATCAAT<br>CTTACCTTGTTATTTCACATGGTAATGGTGATTAA                              |                              |                                                                            |
| n/a                                                                                                                                                                                                                                                                         | <i>his6-sonA_M47-L53del</i>  | Hexahistidine-tagged borosin precursor variant for heterologous expression |
| ATGCATCATCATCATCACATGTCTGGATTATCGGATTTTTTTACCCAGTTAGGCCAAGATGC<br>GCAGTTAATGGAAGACTATAAACAGAATCCTGAGGCGGTGATGCGTGCCACGGATTAAGTATGAT<br>GAACAAATTAACGCTGTAATGACTGGGGATAGTGGTGATAGTAGCTATCAATCTTACCTTGTTAT<br>TTCACATGGTAATGGTGATTAA                                          |                              |                                                                            |
| n/a                                                                                                                                                                                                                                                                         | <i>his6-sonA_K51-S57del</i>  | Hexahistidine-tagged borosin precursor variant for heterologous expression |
| ATGCATCATCATCATCACATGTCTGGATTATCGGATTTTTTTACCCAGTTAGGCCAAGATGC<br>GCAGTTAATGGAAGACTATAAACAGAATCCTGAGGCGGTGATGCGTGCCACGGATTAAGTATGAT<br>GAACAAATTAACGCTGTAATGACTGGGGATATGGAAAAGCTCAGCTATCAATCTTACCTTGTTAT<br>TTCACATGGTAATGGTGATTAA                                          |                              |                                                                            |
| n/a                                                                                                                                                                                                                                                                         | <i>his6-sonA_M47-L53dup</i>  | Hexahistidine-tagged borosin precursor variant for heterologous expression |
| ATGCATCATCATCATCACATGTCTGGATTATCGGATTTTTTTACCCAGTTAGGCCAAGATGC<br>GCAGTTAATGGAAGACTATAAACAGAATCCTGAGGCGGTGATGCGTGCCACGGATTAAGTATGAT<br>GAACAAATTAACGCTGTAATGACTGGGGATATGGAAAAGCTCAAACGTTAATGGAAAAGCTCA<br>AAACGTTAAGTGGTGATAGTAGCTATCAATCTTACCTTGTTATTTCACATGGTAATGGTGATTAA |                              |                                                                            |
| n/a                                                                                                                                                                                                                                                                         | <i>his6-sonA_K51-S54dup</i>  | Hexahistidine-tagged borosin precursor variant for heterologous expression |
| ATGCATCATCATCATCACATGTCTGGATTATCGGATTTTTTTACCCAGTTAGGCCAAGATGC<br>GCAGTTAATGGAAGACTATAAACAGAATCCTGAGGCGGTGATGCGTGCCACGGATTAAGTATGAT<br>GAACAAATTAACGCTGTAATGACTGGGGATATGGAAAAGCTCAAACGTTAAGTAAAACGTTAA<br>GTGGTGATAGTAGCTATCAATCTTACCTTGTTATTTCACATGGTAATGGTGATTAA          |                              |                                                                            |
| n/a                                                                                                                                                                                                                                                                         | <i>his6-sonA_K51-L53dup</i>  | Hexahistidine-tagged borosin precursor variant for heterologous expression |
| ATGCATCATCATCATCACATGTCTGGATTATCGGATTTTTTTACCCAGTTAGGCCAAGATGC<br>GCAGTTAATGGAAGACTATAAACAGAATCCTGAGGCGGTGATGCGTGCCACGGATTAAGTATGAT<br>GAACAAATTAACGCTGTAATGACTGGGGATATGGAAAAGCTCAAACGTTAAAACGTTAAGTG<br>GTGATAGTAGCTATCAATCTTACCTTGTTATTTCACATGGTAATGGTGATTAA              |                              |                                                                            |
| n/a                                                                                                                                                                                                                                                                         | <i>his6-sonA_XaCORE55-56</i> | Hexahistidine-tagged borosin precursor variant for heterologous expression |
| ATGCATCATCATCATCACATGTCTGGATTATCGGATTTTTTTACCCAGTTAGGCCAAGATGC<br>GCAGTTAATGGAAGACTATAAACAGAATCCTGAGGCGGTGATGCGTGCCACGGATTAAGTATGAT<br>GAACAAATTAACGCTGTAATGACTGGGGATATGGAAAAGCTCAAACGTTAAGTGGTatcgagggg<br>AGGGATAGTAGCTATCAATCTTACCTTGTTATTTCACATGGTAATGGTGATTAA          |                              |                                                                            |



|                                                                                                                                                                                                                                                                                                                                                                                                                                                                                                                                                                                                                                                                                                                                                                                                                                                                                                                                                                                                                                                                                                                                                                                                                                                                                                                                                                                                                                                                                                                                                                                                                                                                                                                                                                                                                                                                                                                                                                                                                                                                                                                                                                                                                                                                                                                                                                                                                                                                                                                                                                                                                                                                                                                                                                                                                                                                                                                                                                                      |                                           |                                                                                                                                                                   |
|--------------------------------------------------------------------------------------------------------------------------------------------------------------------------------------------------------------------------------------------------------------------------------------------------------------------------------------------------------------------------------------------------------------------------------------------------------------------------------------------------------------------------------------------------------------------------------------------------------------------------------------------------------------------------------------------------------------------------------------------------------------------------------------------------------------------------------------------------------------------------------------------------------------------------------------------------------------------------------------------------------------------------------------------------------------------------------------------------------------------------------------------------------------------------------------------------------------------------------------------------------------------------------------------------------------------------------------------------------------------------------------------------------------------------------------------------------------------------------------------------------------------------------------------------------------------------------------------------------------------------------------------------------------------------------------------------------------------------------------------------------------------------------------------------------------------------------------------------------------------------------------------------------------------------------------------------------------------------------------------------------------------------------------------------------------------------------------------------------------------------------------------------------------------------------------------------------------------------------------------------------------------------------------------------------------------------------------------------------------------------------------------------------------------------------------------------------------------------------------------------------------------------------------------------------------------------------------------------------------------------------------------------------------------------------------------------------------------------------------------------------------------------------------------------------------------------------------------------------------------------------------------------------------------------------------------------------------------------------------|-------------------------------------------|-------------------------------------------------------------------------------------------------------------------------------------------------------------------|
| n/a                                                                                                                                                                                                                                                                                                                                                                                                                                                                                                                                                                                                                                                                                                                                                                                                                                                                                                                                                                                                                                                                                                                                                                                                                                                                                                                                                                                                                                                                                                                                                                                                                                                                                                                                                                                                                                                                                                                                                                                                                                                                                                                                                                                                                                                                                                                                                                                                                                                                                                                                                                                                                                                                                                                                                                                                                                                                                                                                                                                  | <i>pET28b-ss-strep-tev-so0867-tev-his</i> | <i>S. oneidensis</i> protease with N-terminal <i>E. coli</i> periplasmic signal sequence, strep tag, TEV cleavage site. C-terminal TEV cleavage site and his-tag. |
| <p>ATGAAAAAGATTTGGCTGGCGCTGGCTGGTTTAGTTTTAGCGTTTAGCGCATCGGCGTGAGC<br/> CACCCGCAGTTCGAAAAGAGCGCAGAGGGACTGTACTTCCAGTCACATATGAAAGATGCCCT<br/> GTCTATGAAAAGATGCCATTCTCGTGGTGTATAAAGACAATGCAACTAAAGCAGAGCGCTCGG<br/> CGGCTCAGCGTTTAATTCGTGGAACATTAACCGATGTCAATGCCGATGGTGTGACGATAAATT<br/> TCCGCATTTACTTAACGGCAAGCTGGCCCGTTTAGCATTGCGTAAAGGGCGCCAATATTGAAGAT<br/> GCCATTAAGGTGATCAGCCGTCATCCTGCGGTGAAATACGCTGAGCCTAACTATATTATCAAAG<br/> CGATAGGTACACCTGATGACCCAAGTTTTGCCAGCCTATGGGGAATGAATAACACTGGCCAAAG<br/> CGGTGGCACTGCCGATGCGGATATCGATGCACCTGAAGCTTGGGAAATCACCACAGGTAGCTC<br/> TGATGTGGTGAATTGGCGTTATCGATACCGGTGTGGATTACAACCATCCCGATTTGCAAGCCAAT<br/> ATGTGGGTCAATGCGGGCGAAATTGCGGGCAATGGCATCGATGATGACGCAAACGGTGTATC<br/> GACGATATTCATGTTACAGTGCCGTGAATAATAACGGAAATCCAATGGACGGAAACGGCCAC<br/> GGTACCCATGTTTCTGGCACGATTGGCGCTAAAGGTAATAACGGTGTCCGGTGTAGTAGGCGTT<br/> AACTGGGACGTTAAAATTGCCGGATGTCAGTTCCTCGATACTGACGGTTATGGCTCTACCGCGG<br/> GCGCTATTGCGTGTATCGATTATTTACCAACCTTAAGGTTAATCATGGGGTTGATATTAAGCGG<br/> ACCAACAACCTTTGGGGCGGTGGCGGCTTTAGTCAAGCATTAAAAGATGCAATTGAAGCGGGT<br/> GGTGAAGCAGGGATTTTATTTGTTGCCGCAGCAGGAAACGATGCCGTCGATAATGATGCGAGC<br/> CCACACTATCCTTCAAGCTATAACTCTGATGTGGTGTCTCCATTGCCAGTACAACCTCGCAATGA<br/> CCGATGTGCAACTTCTACAATGGGGTTAACCAGTGTGATATGGGCGCGCCAGGCTCGGC<br/> GATTTTATCAACTGTCCGTGGCGGTGGTTACGCGACTTACTCTGGTACCTCGATGGCAACTCCC<br/> CACGTGACGGGCGCCGCGCTCTCGTTTGGGCATTAAACCCTGACTTAACACCTGTTGAAATG<br/> AAAGAACTACTGATGGCCTCAGGTGATGCGAATGCGGATTAACCGGTAAAACGGTTGCGGGT<br/> ACTCGCCTCAATGTGGCTAATGCGCTGGAGCAGGCAAACCCATCACCTAGCTATAAGTTTACC<br/> GTATCACCGGCTTACAATCTGTGCAAGCAGGCGCTGCAAGCTATAACTTCAAGTGTGGCA<br/> GTGTGGCAGGTTGGGATGGTGTGTCGCATTGACTGTGACGCGTGTACCTGCACCTGAAAGGGG<br/> TTTCATTATCAAGTTCAACCGTTTCTGCGGGTGGTTCATTTACCTTAAACGTGGCGACAACCGC<br/> GCAAACGGTTTGGGGTATTACAGCATTACGGTGACGGGCAATGATGGTGCAGTTGAAAAGTC<br/> TAAAGTCGTGTCGCTTAATGTCTTCCACAAGGATTAACGACTTTACCTATGGTAATGAGA<br/> ACTCTGTAGCCATTCCGGATAACAACCCTAATGGCGTTATTAGCACAATAGAAGTCGCCGACGATGT<br/> ACAGATTTTTGGTGTGCTCGCTGACGTGAATATCAGTCACACTTGGATTGGTACTTACGCGTT<br/> GTGCTAACCTCACCAGCGGGTACTCAAGTGGTGTACATAACCGCGATGGTGGCAGTGCTGAT<br/> AATATCGTTAAGAGCTGGGATCTAAGCGCATTGATGGTGA<br/> AAAATGTACGTGGTACTTGGTCAT<br/> TATCTGTCGATGACAATGTGGGTTGAGATACCGGAACGCTTAATAACTGGGGCTTAGTCATCAG<br/> CGGCTTAGGTGAGGCTTCCCCAGCTGCGCCTGTTGCAGTTTTGAGTTTCCGTTGAAGGATT<br/> AGGCGTAGCCTTACCAACACCAGTACAGATGCAAATGATGATATCGTCAGTTACAGCTGGGAC<br/> TTTGGTGTGTTACAAACTCTACTGAGATGAACCCAAGCCATGTTTATACCTCTGCGGGTACTTA<br/> TACTGTGCTTTGACTGTGACCGATTCAATGGATCACAGCAACACTGTGACGATGCCTGTACAA<br/> GTCTATGAGCATAATTAATGCTGCTGTTAGCCGCGCATTAGTATCGCGCCGTGGCAGTGCAA<br/> TGGTAGATCTCACTTGGGATAGTGCTTTAGGTGAAAACGTTGCCCTTACC<br/> CGGAATGGTGAAGTGT<br/> GGTGGTAACGACTGAGAACGATGGTAGCTATCGTGATCGCTTACGACCACCGCCTCAAGTGT<br/> GACTTATCAAGTGTGTGAAACGACAGGAACATTATGTTCTGCGCCAGTTGTGCGCGCAGTTGCGAG<br/> GGACTGTACTTCCAGTCACGGGATCCGAATTCGAGCTCCGTGCAAGCTTGGCGCCGCACTC<br/> GAGCACCACCACCACCAC</p> |                                           |                                                                                                                                                                   |
| n/a                                                                                                                                                                                                                                                                                                                                                                                                                                                                                                                                                                                                                                                                                                                                                                                                                                                                                                                                                                                                                                                                                                                                                                                                                                                                                                                                                                                                                                                                                                                                                                                                                                                                                                                                                                                                                                                                                                                                                                                                                                                                                                                                                                                                                                                                                                                                                                                                                                                                                                                                                                                                                                                                                                                                                                                                                                                                                                                                                                                  | <i>His-so_1059_ecoli_sig_p ET28b</i>      | <i>S. oneidensis</i> protease with N-terminal <i>E. coli</i> periplasmic signal sequence and C-terminal hexahistidine tag for heterologous expression             |
| <p>ATGAAAAAGATTTGGCTGGCGCTGGCTGGTTTAGTTTTAGCGTTTAGCGCATCGGCGGCCGTC<br/> CAAAATCCTTTAAATACAGGACCAAGGGATACGAGTCCCTATATCAGCCAGTATCAGGCAAGTT<br/> TGCGTTCACAGGTGATATCGAATGTACATTATGAGTTGGATTTTCAACTGACTGGCGATACCGA<br/> ATTCAGTGCGACAACGAAAGTGAACCTCAATTTAAGCGAAGTGCCCAAGCAACTGAGCTTAGAT<br/> CTCAACAAAGCACAATTAAGCGCTTTTTGATCAACGGCACCGCGTTTATCCTAATTACAATGG<br/> CGCCTATATCAGCCTCAACACTCGCTTACTGACTTCAGGGGAAAACACAATTGAAGTGAATTC<br/> ACCCGAGCCCACAGTACCAATGGTGAAGGTTTGCACCGGTTCCAAGACCCAGTTGATGGCAAG<br/> GTTTACCTTTACTCCATTTTGAACCTGCCGCCGCCAACAATGTTTGGCGTATTTGATCAACC<br/> CGACTTGAAGGCCAATTATAAAATCAGCGTAACTGCACCTAGGGATTGGCAAGTTATCAGTACG<br/> ACCCGTGAAACGACCGTCACCCAGCTGGCGCCTTTAATCGTTGGGAGTTTCTGAAACGCCT<br/> AAGTTAAGCCCTTATAACTTCTCCATGCATGCTGGCCCATATTATATGTGGCAGGATAATTCTGG</p>                                                                                                                                                                                                                                                                                                                                                                                                                                                                                                                                                                                                                                                                                                                                                                                                                                                                                                                                                                                                                                                                                                                                                                                                                                                                                                                                                                                                                                                                                                                                                                                                                                                                                                                                                                                                                                                                                                                                                                                                                                                                                                                                                                                          |                                           |                                                                                                                                                                   |

CCGTTATCCAATGCGCTTATTTCGCACGGCAATCCGTTGCCAGCCAAGTGAATCCACAGGACTG  
GTTTACCTACACCAAACAAGGGTTAACCTTCTTTGACGCCTACTTTGGTATTCCCTTACCCCTTTA  
AAAAATATGATCAGATCCTCGTGCCTGATTTTCTCTACGGCGCGATGGAAAACGCAGGAGCAGT  
GACCTTCGCCGAAGATCACTTCCTCCACAAAAGCGGAAATGACCGCCGAGCAAAAACAAAACCTTA  
GCGGGCGTAATTATGCACGAAATGGCCACCAATGGTTTGGCGATCTGGTGACCATGAAGTGG  
TGGAACAGCCTCTGGTTAAACGAAAGTTTTGCTTCTTTTATGGGTACACTTGCAACCCAAGAAG  
CCACTGAATTTACCAATGCATGGCGCAGTTTTTATGCTCAAGGTAAACAACGTGCCTATGAGCA  
AGACAGCTTAGTGACCACTCATCCCATTGAAGTACCCGTGGCAACAACCCAAAATGCCTTCGAT  
AATATCGATGCCATTACCTATCAAAAAGGCGCCTCAACCCTCAAACAACCTACGCCATTTACTCG  
GTGATGTGGTGTTCGCGCGGCGTGAGCAACTACCTCAAACAATATAGTTATCAAAAATGCCGA  
GCTAGATGACTTCATCAATAGCCTCGCCAAAGCCTCGAATCGTGACTTAAGCGCATGGACGCA  
GGAATGGCTTTACAGCGCAGGGGTAAACACGATCAAGGCAGAGTACCGCTGCGACGGTAACC  
GCATCAGCGAATTTAGCCTACTGCAATATCCTGCCAGCAGCGAACTGCCAACACTTAGGGAGC  
AAAAGTCCAAATCGCGCTCTTCACAAAAGGACGTTTTGATTTACGACATGAGACCACAGTGCC  
AGTCACCTACAAAGGTGAGCGCACGGAAGTGAAGCAATTAGTCGGTGAGCGTTGTCCAGATCT  
GGTTTACCCTAACTACGATGACTGGGGCTATGTAAAGGTACAACCTCGATGACAAATCCTTTGAT  
ACCGCCAAGCAACAGCTAAGCAAGGTGACAGACCCGCTTCTGCGTTCAATGTTATGGCAAAGC  
CTGTGGGACAGTGTGCGTGAGGGCAACCTGAGTTTGGACCAATACCTGAGCACAGTGTTTTATT  
AATGCACCAGCAGAAAATGACTACACAGTCGTCGGCCAAATTTCAAGCCTGCTACGCAGTA  
AAGCGTACCTTGCGCAAATCGCACCAATCCAGCAAACTATGCTGAAAATGCAGTAAAAGGCTT  
AGCACAAATGAGCCTTCGAAAACCATGGAGAGTAGAGGCAACAATGACTTCCAGCGCCGCTG  
GTTAATGCCTATATTCAATTAGCGGGCGATCGCGACAGTTTACGCCACTTAGCACAATTACTAG  
ATGGCACAACCAAATCAAAGGGTTAACCTTAGATCAAGATCTGCGCTGGGCTATCATAACTCA  
GCTCAATCGCTACGACTTCCCAATGCGCAGCAACGTATTACACGGGAAAGCGCACGCGATAA  
CTCAGATTCAGGGGAAAAGTCTGCATTAGCTGCACAGTTATCCGCCCAGAAGCCGCGGGCGAA  
GCGTCGTTGGTTAAGTAAGGTGCATACCGATGCACTGCCCTTTGCAAAACAGCGCATTATCATG  
GAAAACCTTTATCCTGCTGAGCAAAAGCTCTTAAGTGCGGCCACCGCCGAAGAGCGCCTCGCA  
AACTTAGCAGACATGGATAAAAAAGGCCCGGTGTTTATGCGTAGCTACAGCCGCACTCTTATTC  
CAACCGATTGTAACATAACAGTATTGCGGCCTTAGATAAAGTATTAGACAGCCAAACAGGCTT  
ATCTAATCTTAGCCGTCGAACCTTATTAGAAAACGCGCCAAGCCGAGCAGCGCTGCGTACTAATT  
AAAAATAAAATGACCCATGGCAGCGGCCACCATCACCATCACCATTTGA

**Table S2| Crystallographic data and statistics.**

| <b>Data collection statistics</b>   |                                                                  |                                                             |
|-------------------------------------|------------------------------------------------------------------|-------------------------------------------------------------|
|                                     | SonM—SonA_Q60-Y62del—<br>SAM                                     | SonM—SonA_Q60-Y62del—<br>SAH                                |
| PDB ID                              | 8T1T                                                             | 8T1S                                                        |
| Resolution (Å)                      | 1.55                                                             | 2.00                                                        |
| Diffraction source                  | APS Argonne 23ID-D                                               |                                                             |
| Wavelength (Å)                      | 1.0332                                                           |                                                             |
| Detector                            | Dectris Pilatus3-6M                                              |                                                             |
| Rotation range per image (°)        | 1                                                                |                                                             |
| Total rotation range (°)            | 300                                                              |                                                             |
| Space group                         | P1                                                               | P2 <sub>1</sub>                                             |
| Unit-cell parameters (Å)            | a = 52.5, b = 59.3,<br>c = 60.1;<br>α = 95.9 γ = 96.5, β = 112.6 | a = 52.3, b = 108.7,<br>c = 59.1;<br>α = γ = 90.0, β = 93.7 |
| Resolution range (Å)                | 1.55 (1.65-1.55)                                                 | 2.00 (2.10-2.00)                                            |
| N° of reflections (last bin)        | 246150 (43667)                                                   | 240759 (34051)                                              |
| N° of unique reflections (last bin) | 87728 (15117)                                                    | 44465 (6044)                                                |
| Completeness (%) (last bin)         | 92.1 (92.8)                                                      | 99.7 (100.0)                                                |
| Redundancy                          | 2.80 (2.89)                                                      | 5.41 (5.63)                                                 |
| $\langle I/\sigma(I) \rangle$       | 12.53 (2.00)                                                     | 10.89 (4.50)                                                |
| $R_{\text{meas}}$ (%)               | 5.4 (71.5)                                                       | 11.1 (58.2)                                                 |
| CC <sub>1/2</sub>                   | 99.8 (66.7)                                                      | 99.7 (92.6)                                                 |
| <b>Refinement statistics</b>        |                                                                  |                                                             |
| N° of total model atoms             | 5608                                                             | 5630                                                        |
| $R_{\text{free}}/R_{\text{work}}$   | 20.87/17.31                                                      | 23.81/20.27                                                 |
| Ramachandran favored (%)            | 97.4                                                             | 98.9                                                        |
| Ramachandran allowed (%)            | 2.2                                                              | 1.1                                                         |
| Ramachandran outliers (%)           | 0.3                                                              | 0                                                           |
| <i>Rmsd from ideal</i>              |                                                                  |                                                             |
| Bond lengths (Å)                    | 0.002                                                            | 0.002                                                       |
| Bond angles (°)                     | 0.739                                                            | 0.553                                                       |
| All-atoms clashscore                | 11                                                               | 10.1                                                        |

**Table S3| Bismethylated SonA core peptide masses searched for (a) and identified (b) in the LC-MS/MS data from 24 hour cultures of wt *S. oneidensis*. Only verified masses are highlighted in yellow.**

**a. Peptides searched for and the corresponding monoisotopic mass for the bismethylated species**

| Sequence                | Charge         |          | Sequence         | Charge   |          |
|-------------------------|----------------|----------|------------------|----------|----------|
|                         | 2              | 1        |                  | 2        | 1        |
| TLSGDSSYQSYLVISHGNGD    | 1064.496       | 2127.983 | SYQSYLVISHG      | 641.3279 | 1281.648 |
| LSGDSSYQSYLVISHGNGD     | 1013.972       | 2026.936 | YQSYLVISHG       | 597.8119 | 1194.616 |
| SGDSSYQSYLVISHGNGD      | 957.4298       | 1913.852 | QSYLVISHG        | 516.2802 | 1031.553 |
| GDSSYQSYLVISHGNGD       | 913.9138       | 1826.82  | SYLVISHG         | 452.2509 | 903.494  |
| <b>DSSYQSYLVISHGNGD</b> | <b>885.403</b> | 1769.798 | YLVISHG          | 408.7349 | 816.462  |
| SSYQSYLVISHGNGD         | 827.8896       | 1654.771 | LVISHG           | 327.2032 | 653.3986 |
| SYQSYLVISHGNGD          | 784.3735       | 1567.739 | TLSGDSSYQSYLVISH | 892.9392 | 1784.871 |
| YQSYLVISHGNGD           | 740.8575       | 1480.707 | LSGDSSYQSYLVISH  | 842.4154 | 1683.823 |
| QSYLVISHGNGD            | 659.3259       | 1317.644 | SGDSSYQSYLVISH   | 785.8734 | 1570.739 |
| SYLVISHGNGD             | 595.2966       | 1189.585 | GDSSYQSYLVISH    | 742.3574 | 1483.707 |
| YLVISHGNGD              | 551.7806       | 1102.553 | DSSYQSYLVISH     | 713.8466 | 1426.685 |
| LVISHGNGD               | 470.2489       | 939.49   | SSYQSYLVISH      | 656.3332 | 1311.658 |
| TLSGDSSYQSYLVISHGNG     | 1006.982       | 2012.957 | SYQSYLVISH       | 612.8171 | 1224.626 |
| LSGDSSYQSYLVISHGNG      | 956.4583       | 1911.909 | YQSYLVISH        | 569.3011 | 1137.594 |
| SGDSSYQSYLVISHGNG       | 899.9163       | 1798.825 | QSYLVISH         | 487.7695 | 974.5311 |
| GDSSYQSYLVISHGNG        | 856.4003       | 1711.793 | SYLVISH          | 423.7402 | 846.4725 |
| DSSYQSYLVISHGNG         | 827.8896       | 1654.771 | YLVISH           | 380.2242 | 759.4405 |
| SSYQSYLVISHGNG          | 770.3761       | 1539.744 | LVISH            | 298.6925 | 596.3772 |
| SYQSYLVISHGNG           | 726.8601       | 1452.712 | TLSGDSSYQSYLVIS  | 824.4098 | 1647.812 |
| YQSYLVISHGNG            | 683.3441       | 1365.68  | LSGDSSYQSYLVIS   | 773.886  | 1546.764 |
| QSYLVISHGNG             | 601.8124       | 1202.617 | SGDSSYQSYLVIS    | 717.3439 | 1433.68  |
| SYLVISHGNG              | 537.7831       | 1074.558 | GDSSYQSYLVIS     | 673.8279 | 1346.648 |
| YLVISHGNG               | 494.2671       | 987.5264 | DSSYQSYLVIS      | 645.3172 | 1289.627 |
| LVISHGNG                | 412.7354       | 824.463  | SSYQSYLVIS       | 587.8037 | 1174.6   |
| TLSGDSSYQSYLVISHGN      | 978.4714       | 1955.935 | SYQSYLVIS        | 544.2877 | 1087.568 |
| LSGDSSYQSYLVISHGN       | 927.9476       | 1854.887 | YQSYLVIS         | 500.7717 | 1000.536 |
| SGDSSYQSYLVISHGN        | 871.4056       | 1741.803 | QSYLVIS          | 419.24   | 837.4722 |
| GDSSYQSYLVISHGN         | 827.8896       | 1654.771 | SYLVIS           | 355.2107 | 709.4136 |
| DSSYQSYLVISHGN          | 799.3788       | 1597.75  | YLVIS            | 311.6947 | 622.3816 |
| SSYQSYLVISHGN           | 741.8654       | 1482.723 | LVIS             | 230.163  | 459.3183 |
| SYQSYLVISHGN            | 698.3493       | 1395.691 | TLSGDSSYQSYLVI   | 780.8938 | 1560.78  |
| YQSYLVISHGN             | 654.8333       | 1308.659 | LSGDSSYQSYLVI    | 730.3699 | 1459.732 |
| QSYLVISHGN              | 573.3017       | 1145.595 | SGDSSYQSYLVI     | 673.8279 | 1346.648 |
| SYLVISHGN               | 509.2724       | 1017.537 | GDSSYQSYLVI      | 630.3119 | 1259.616 |
| YLVISHGN                | 465.7564       | 930.5049 | DSSYQSYLVI       | 601.8012 | 1202.594 |
| LVISHGN                 | 384.2247       | 767.4416 | SSYQSYLVI        | 544.2877 | 1087.568 |
| TLSGDSSYQSYLVISHG       | 921.45         | 1841.892 | SYQSYLVI         | 500.7717 | 1000.536 |

|                         |          |          |                |          |          |
|-------------------------|----------|----------|----------------|----------|----------|
| <b>LSGDSSYQSYLVISHG</b> | 870.9261 | 1740.844 | <b>YQSYLVI</b> | 457.2557 | 913.5035 |
| <b>SGDSSYQSYLVISHG</b>  | 814.3841 | 1627.76  | <b>QSYLVI</b>  | 375.724  | 750.4402 |
| <b>GDSSYQSYLVISHG</b>   | 770.8681 | 1540.728 | <b>SYLVI</b>   | 311.6947 | 622.3816 |
| <b>DSSYQSYLVISHG</b>    | 742.3574 | 1483.707 | <b>YLVI</b>    | 268.1787 | 535.3496 |
| <b>SSYQSYLVISHG</b>     | 684.8439 | 1368.68  | <b>LVI</b>     | 186.647  | 372.2862 |

**b. Monoisotopic masses identified in the MS1 and MS2 data**

| Sequence                | Parent mass | MS1 | Retention time (min) | MS2 data supporting sequence |
|-------------------------|-------------|-----|----------------------|------------------------------|
| <b>DSSYQSYLVISHGNGD</b> | 885.4041    | ✓   | 11.44                | ✓                            |
| <b>SYLVISHGNGD</b>      | 595.2997    | ✓   | 11.50                | ✗                            |

**Figure S1| Mass spectrometric analysis of SonA variants.** HPLC-MS/MS spectra from wt his<sub>6</sub>-SonA and variants after reaction overnight with wt his<sub>6</sub>-SonM. Reactions were set-up under conditions containing 50 mM HEPES pH 8, 1 mM SAM, 8 μM SAHN, 5 μM his<sub>6</sub>-SonM, and 80 μM his<sub>6</sub>-SonA (mutant or wt). Reactions were quenched with 5x SDS-dye and boiled for 5 min. SonA proteins were prepared for mass spectrometry analysis by in-gel digest (AspN or Trypsin) and the MS/MS scans showing the methylation pattern for each mutant is displayed below. For wt SonA, 0, 1, and 2 methylated species are shown (A-D), for SonA\_K51-L53dup (E), SonA\_K51-L53del (F), \*SonA\_K51-S54dup (G), SonA\_K51-S54del (H), \*SonA\_M47-L53dup (I), SonA\_M47-L53del (J) scans for the 2-methylated species are shown as the methylation data was consistent with wt. For SonA\_K51-S57del (K-O) and SonA\_Q60-Y62del (P-S) 0, 1, and 2 methylated species are shown. Primary amino acid sequences for the digested peptide are written above the spectra with confirmed (closed) or inferred (open) methylated residues circled (orange). Within the amino acid sequence, grey lines denote fragmentation with the masses written above (b-ions) and below (y-ions). Masses of fragments containing methylated residues are denoted with “Me” in brackets. Generally, a cut-off of 10 ppm was used. Samples marked with “\*” used a cut-off of 20 ppm. Difference (ppm) between expected and observed masses are in parentheses.



B

● Methylation localized by LC-MS/MS

○ Methylation inferred by LC-MS/MS

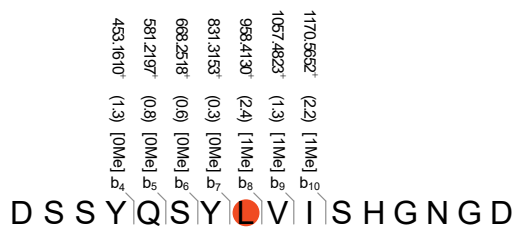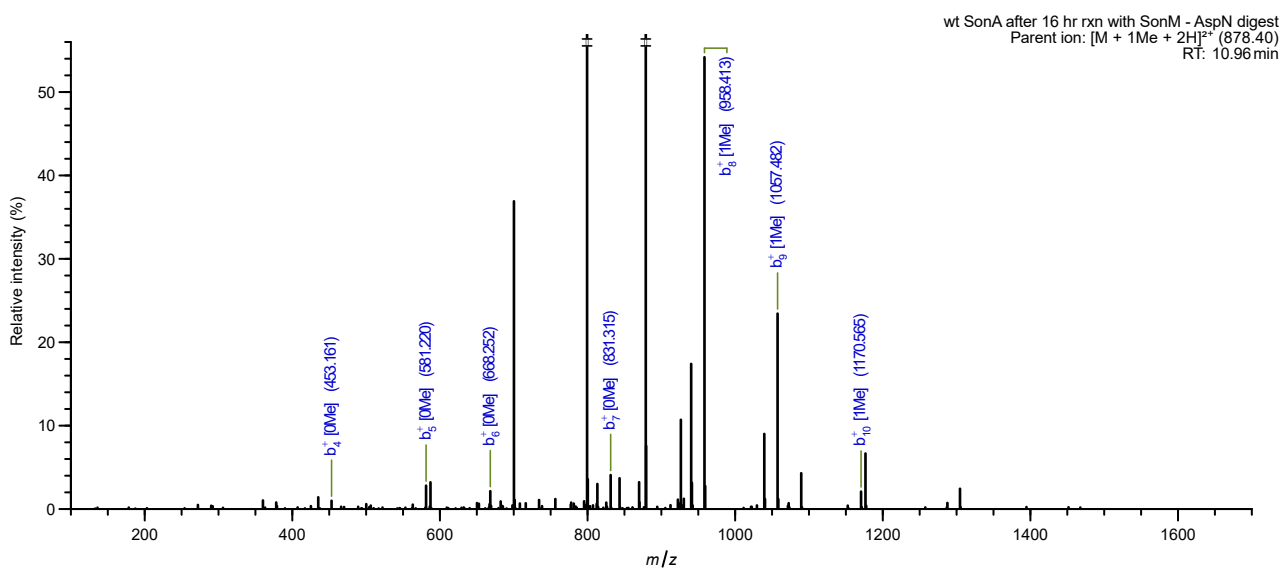



C

- Methylation localized by LC-MS/MS
- Methylation inferred by LC-MS/MS

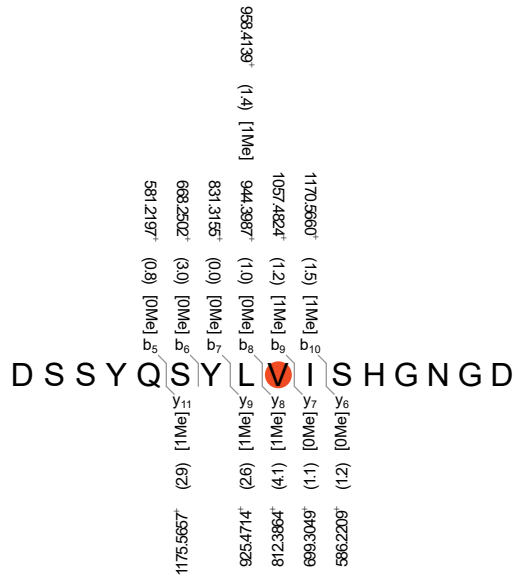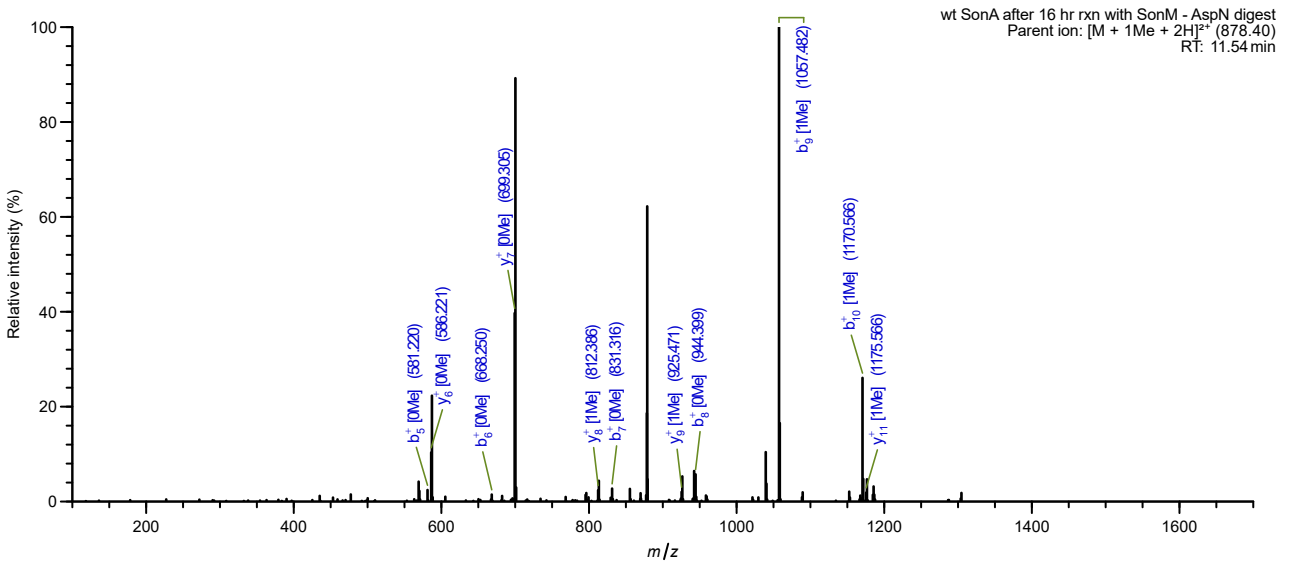

D

- Methylation localized by LC-MS/MS
- Methylation inferred by LC-MS/MS

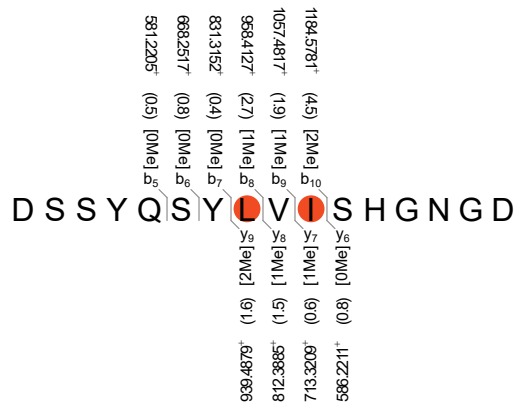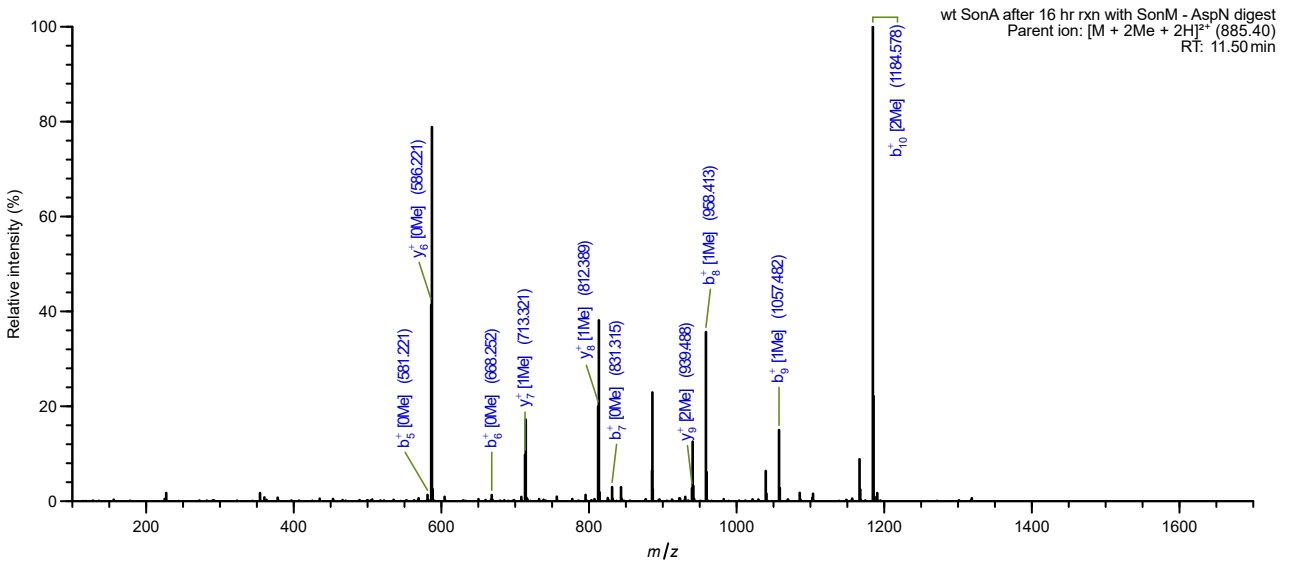

E

- Methylation localized by LC-MS/MS
- Methylation inferred by LC-MS/MS

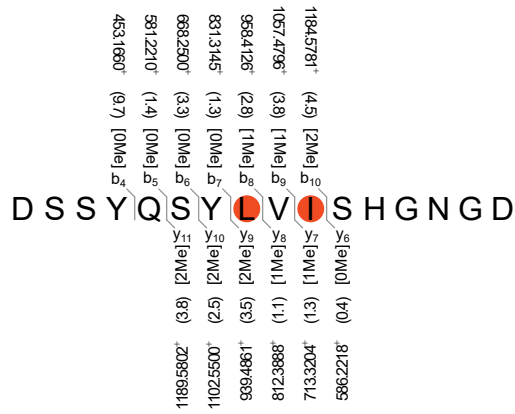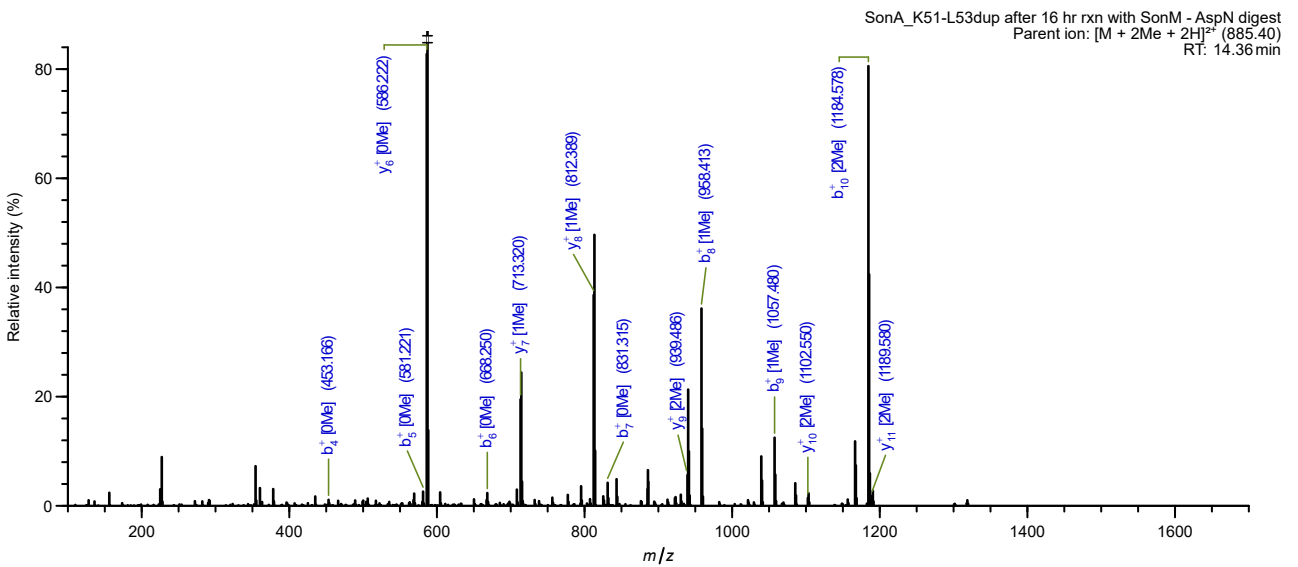

F

- Methylation localized by LC-MS/MS
- Methylation inferred by LC-MS/MS

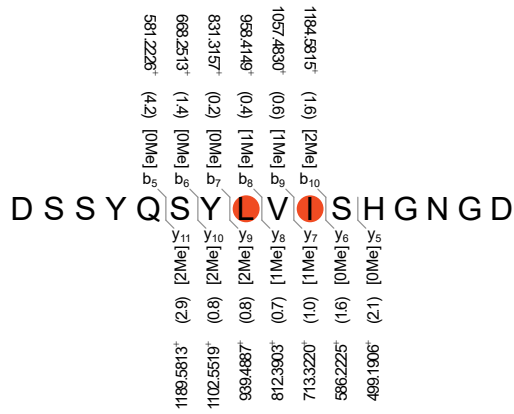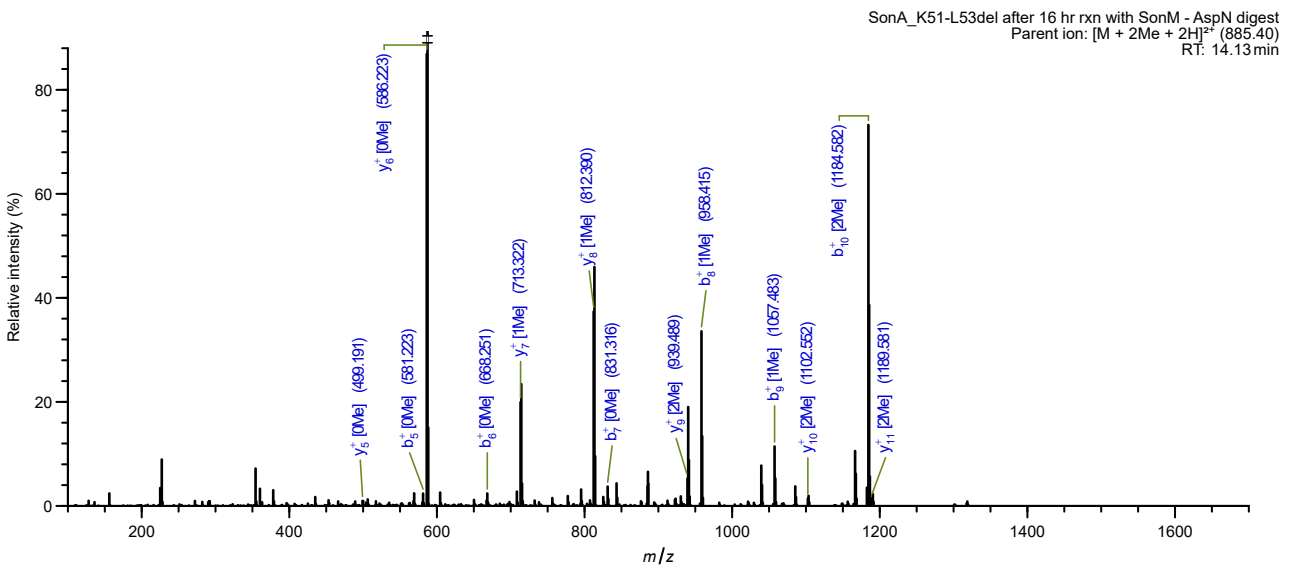

G

- Methylation localized by LC-MS/MS
- Methylation inferred by LC-MS/MS

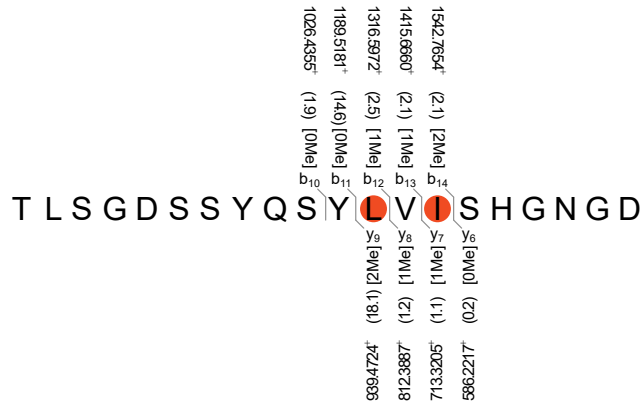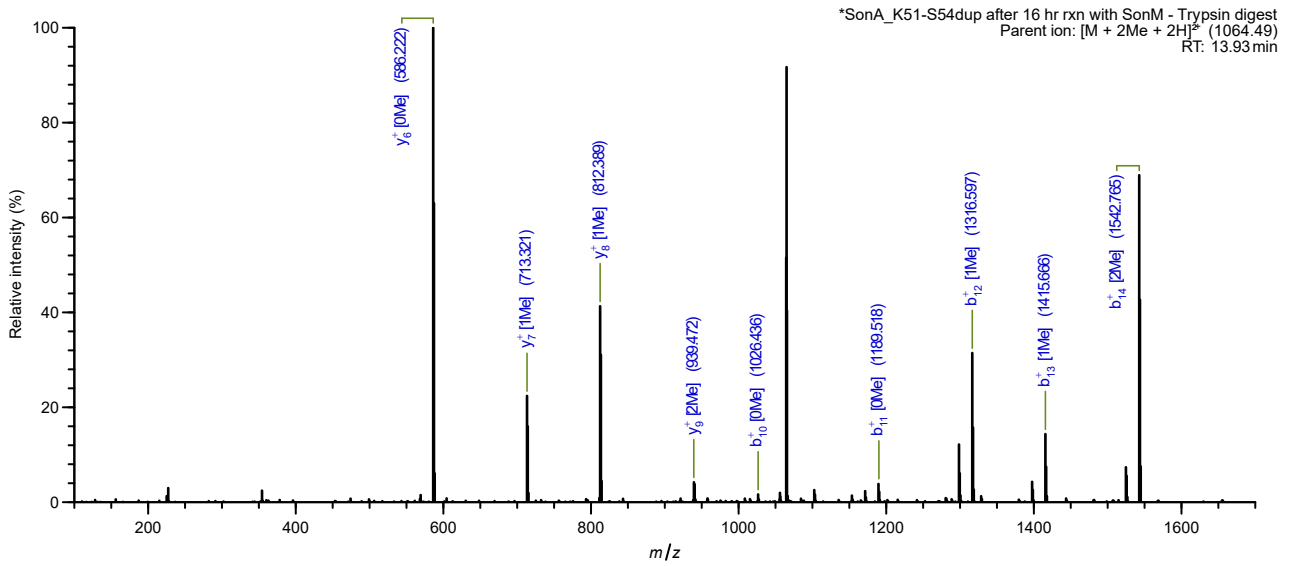



I

- Methylation localized by LC-MS/MS
- Methylation inferred by LC-MS/MS

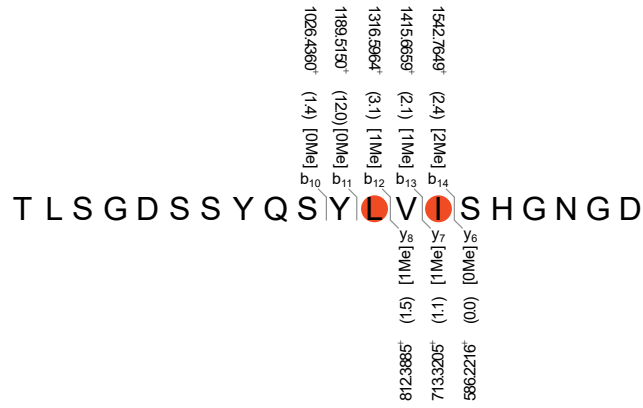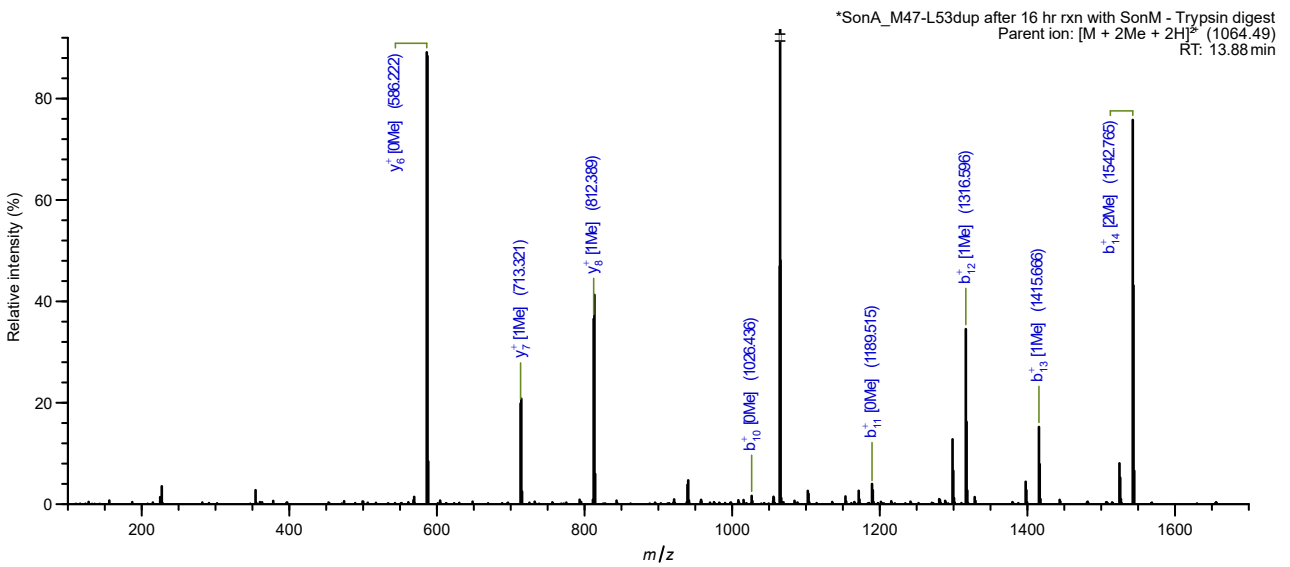

J

- Methylation localized by LC-MS/MS
- Methylation inferred by LC-MS/MS

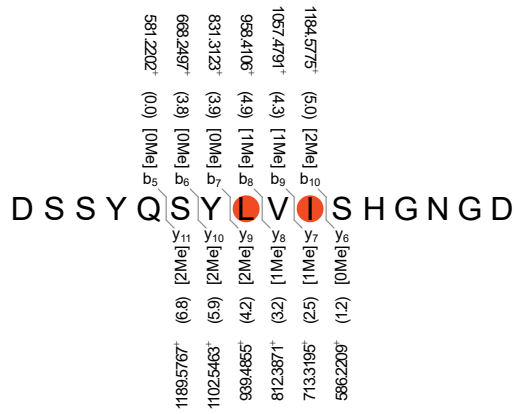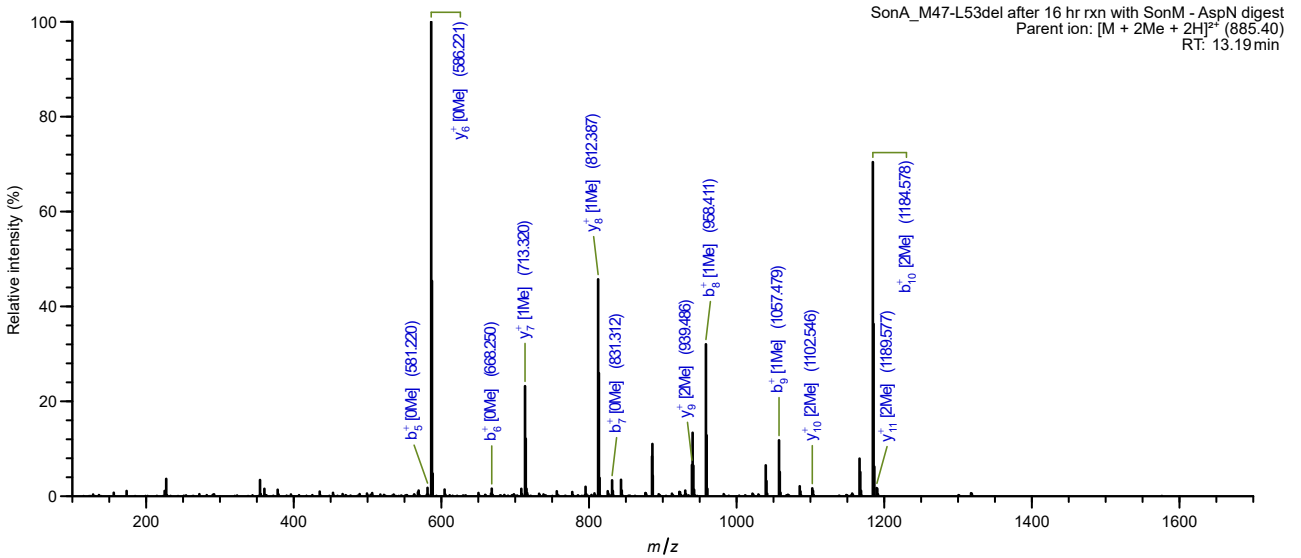



K

● Methylation localized by LC-MS/MS

○ Methylation inferred by LC-MS/MS

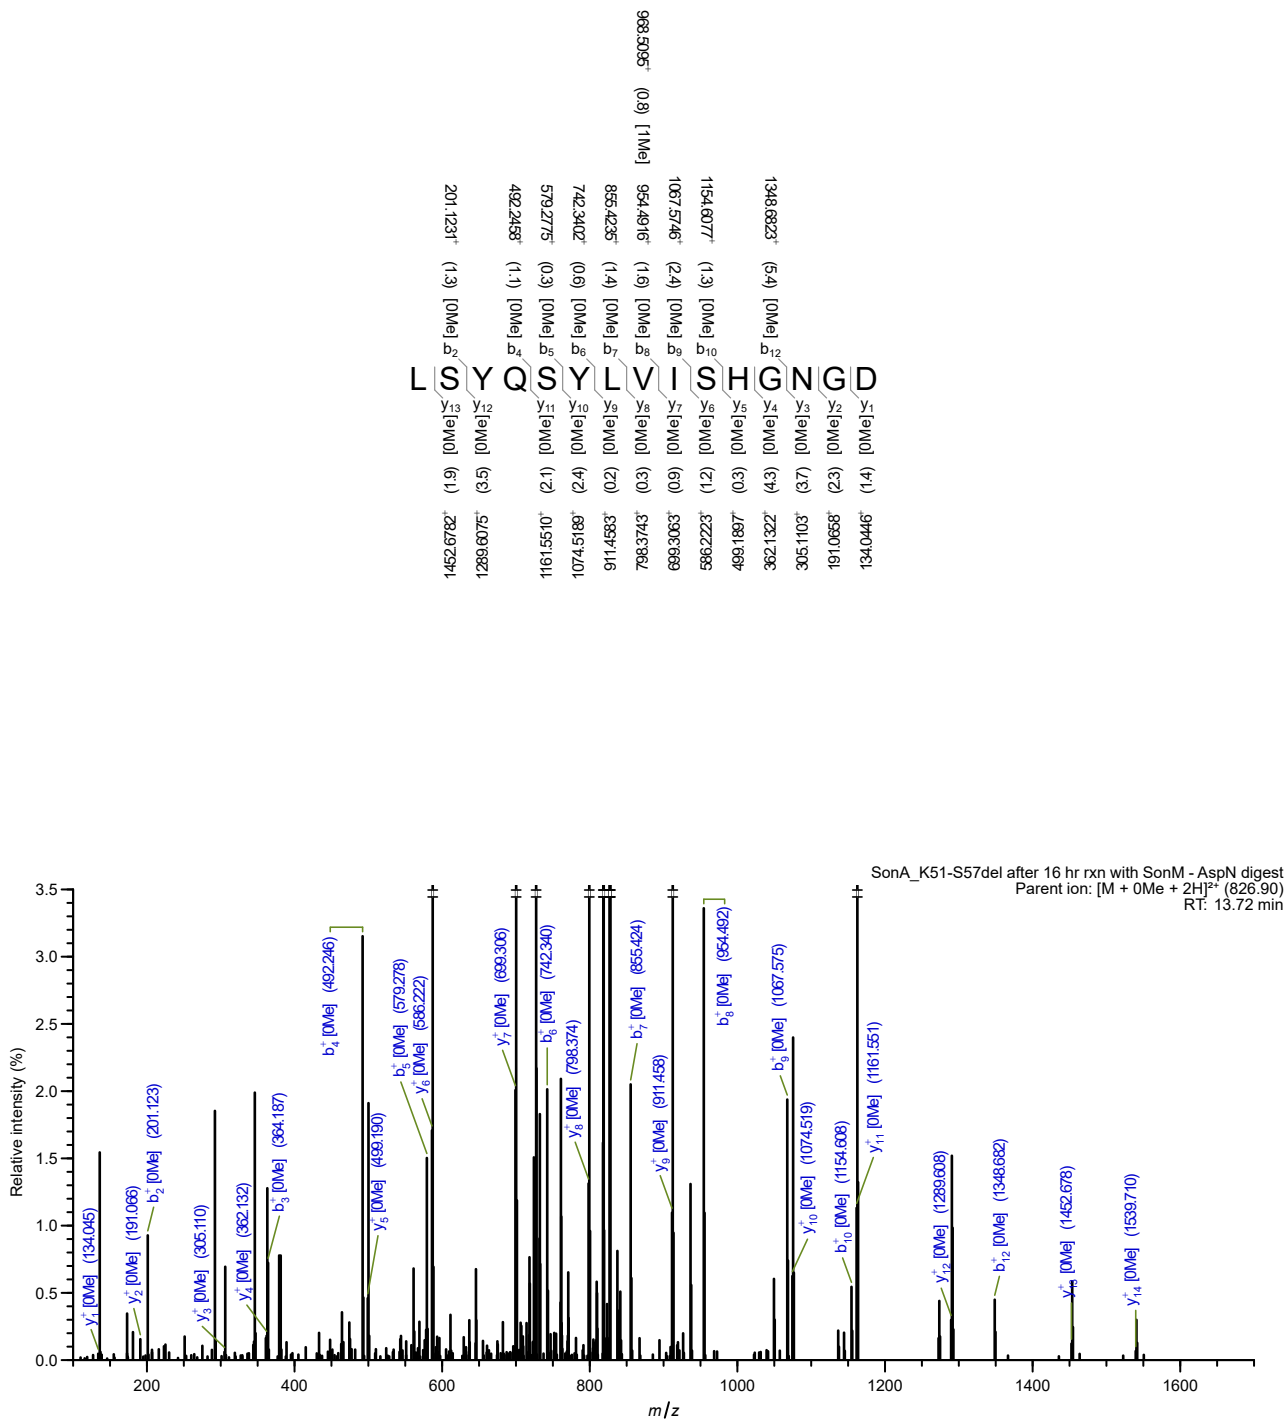

L

- Methylation localized by LC-MS/MS
- Methylation inferred by LC-MS/MS

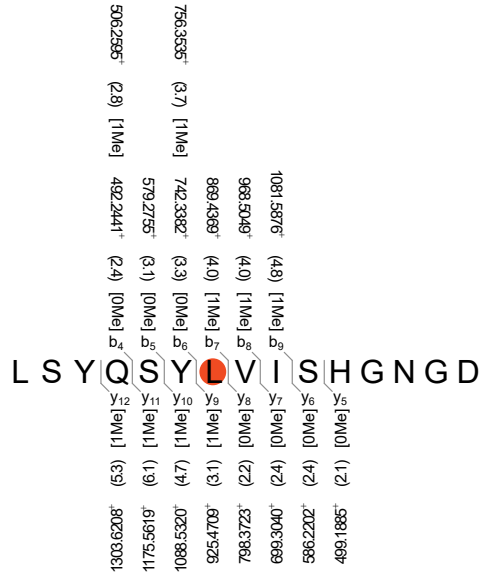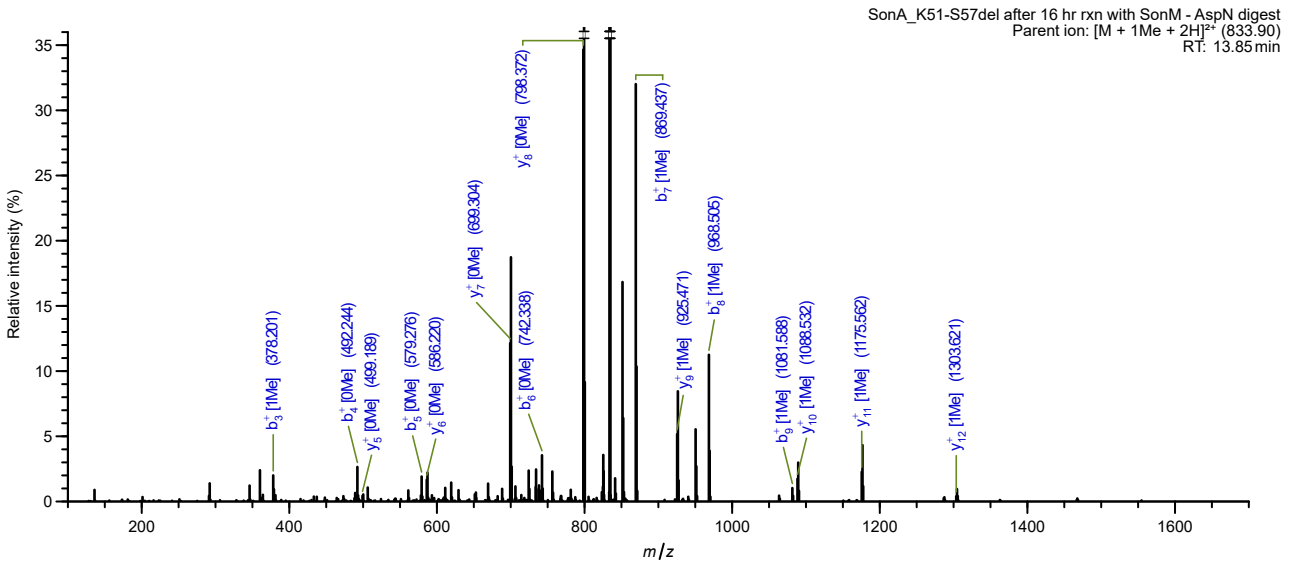

M

- Methylation localized by LC-MS/MS
- Methylation inferred by LC-MS/MS

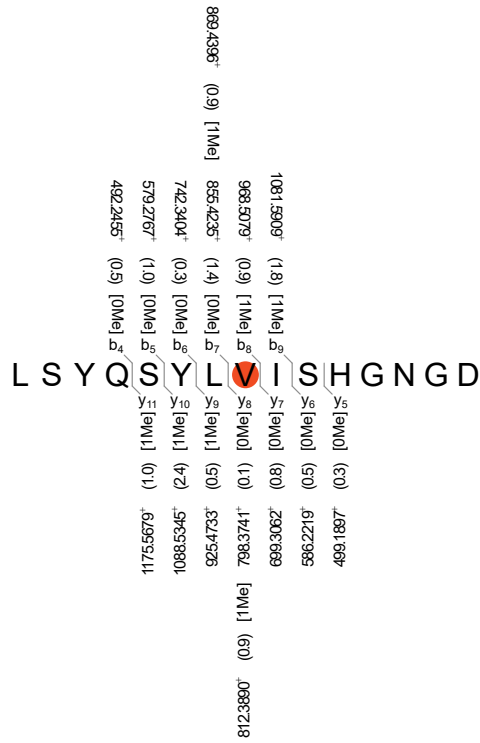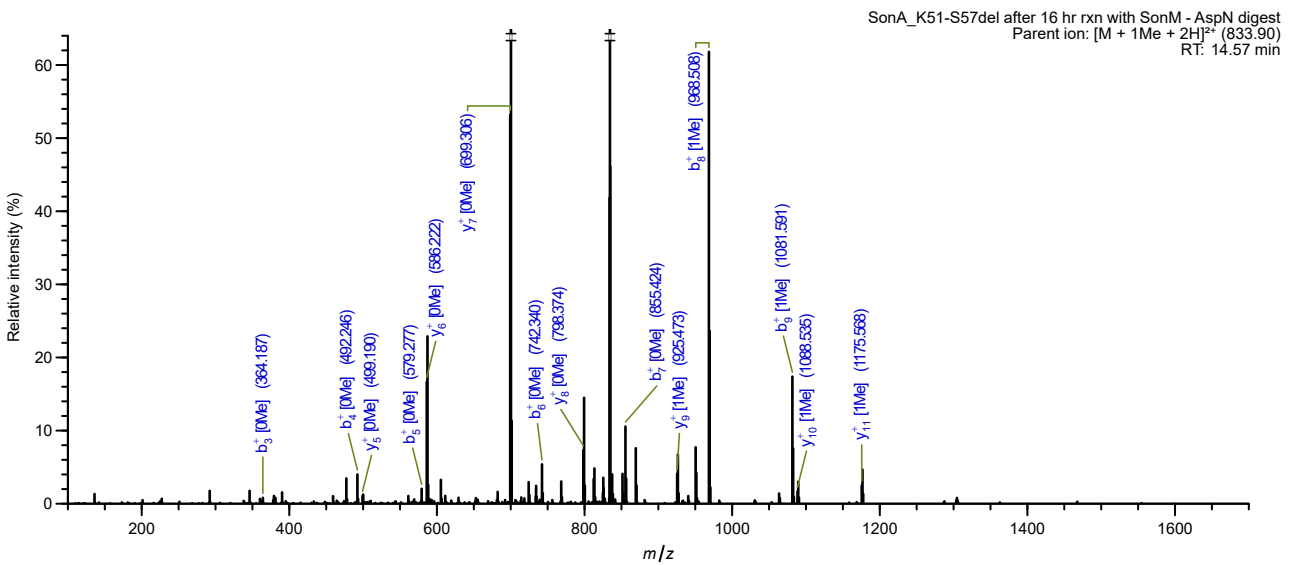



O

● Methylation localized by LC-MS/MS

○ Methylation inferred by LC-MS/MS

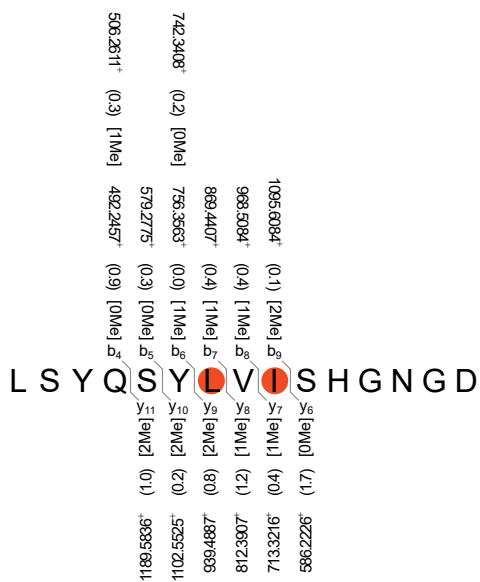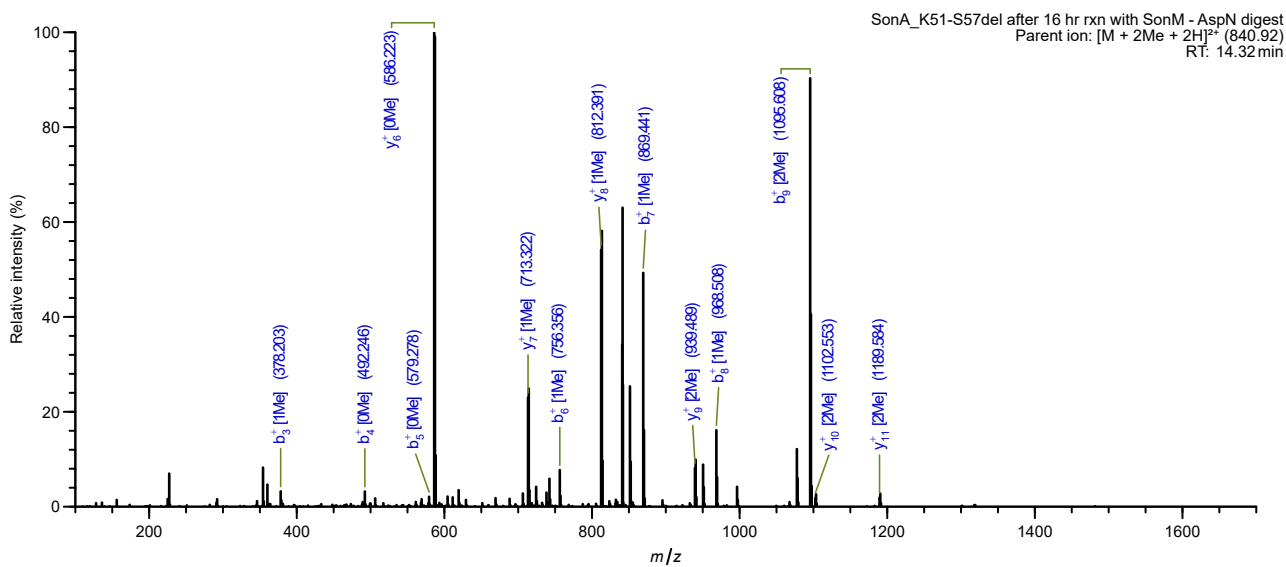

P

- Methylation localized by LC-MS/MS
- Methylation inferred by LC-MS/MS

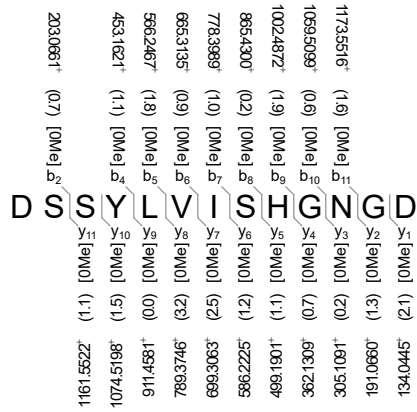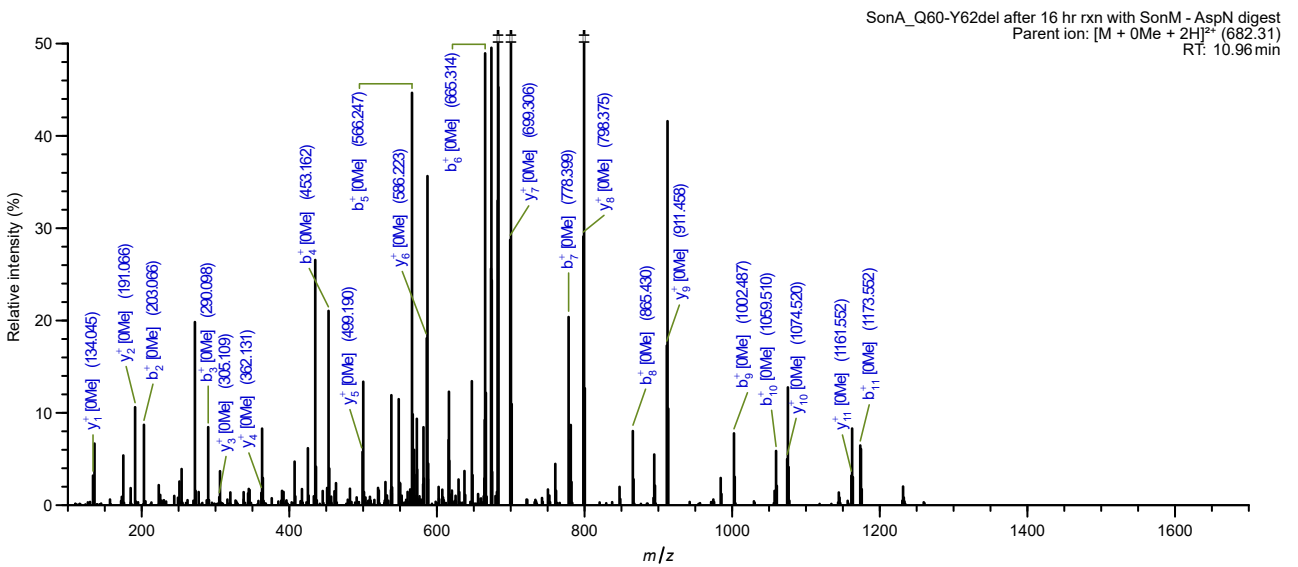

Q

- Methylation localized by LC-MS/MS
- Methylation inferred by LC-MS/MS

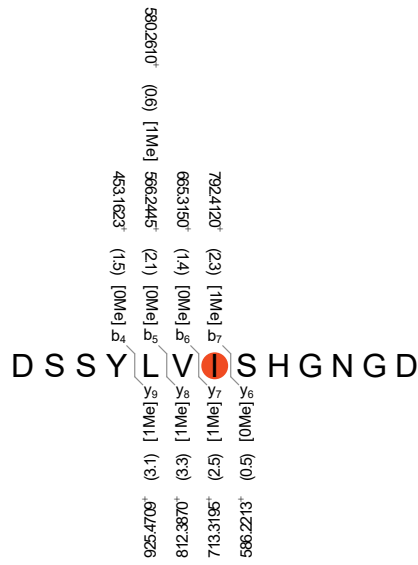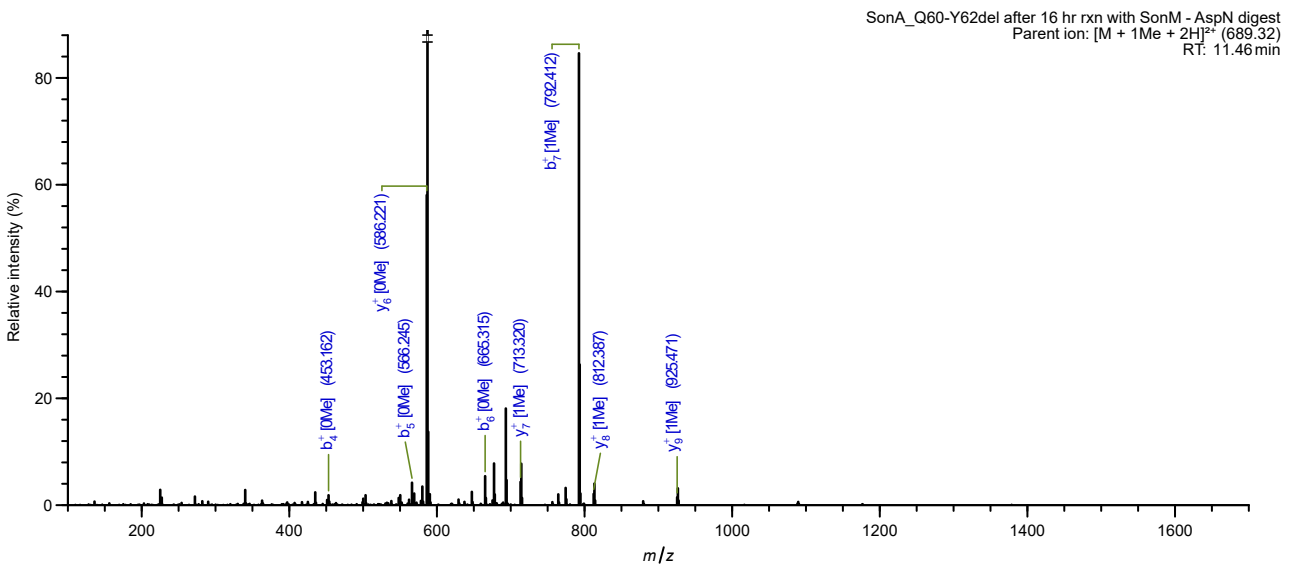





S

- Methylation localized by LC-MS/MS
- Methylation inferred by LC-MS/MS

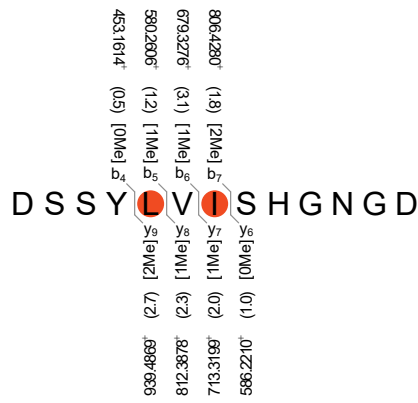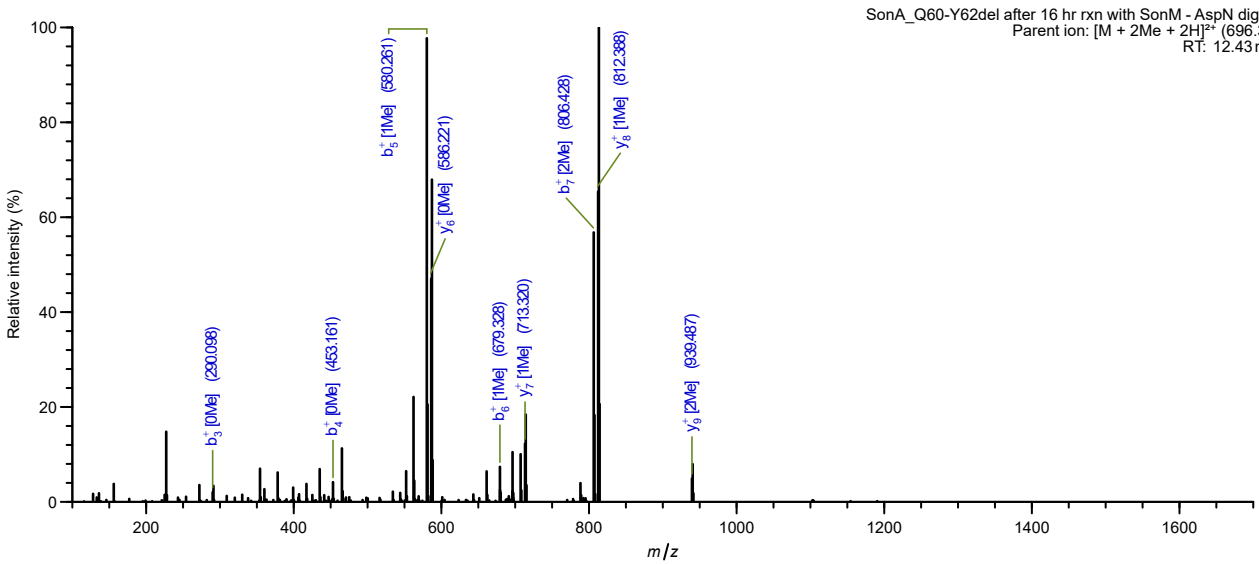

**Figure S2| SonM—SonA\_Q60-Y62del—SAH structure.** PDB code: 8T1S (A) Global orientation of the heterocomplex (green and pink cartoon, SonM, yellow and cyan cartoon, SonA\_Q60-Y62del). Both heterodimers have SAH bound (orange sticks) in the active site. A metal (shown as a grey sphere) is depicted. (B) Close view on the metal binding site at the interface of the two SonM molecules (chain A and C, designated by subscripted letters). Distances are indicated in Ångstroms.

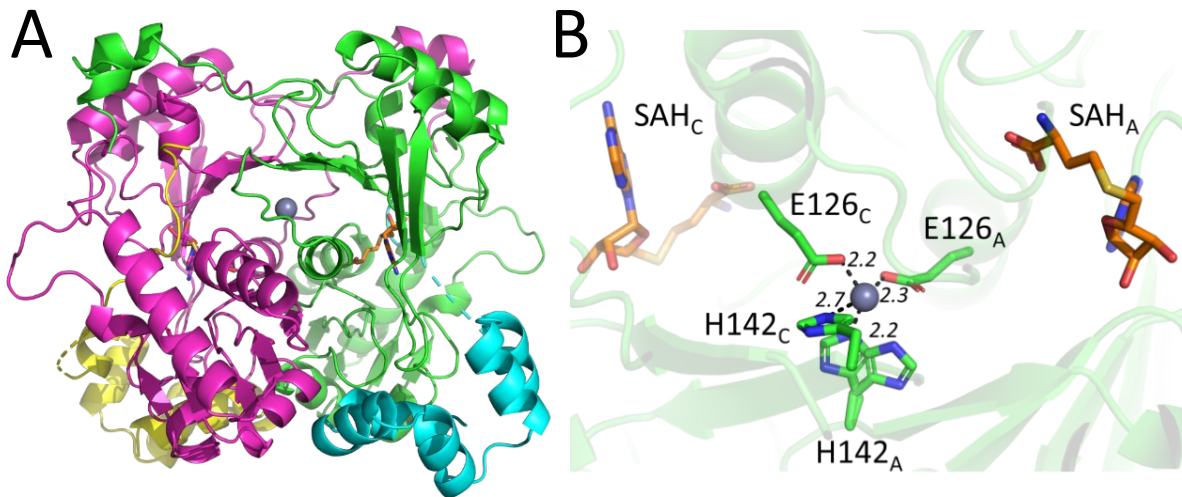

**Figure S3| ICP-OES analysis for SonM+SonA\_Q60-Y62del.** An aliquot of the SonM+SonA\_Q60-Y62del complex used to lay crystal trays was concentrated, acidified, and submitted for ICP-OES at the Research Analytical Laboratory at the University of Minnesota. A fraction containing protein (grey) was run in duplicate and compared to a buffer-only control (black) plotted below. The metal is plotted against the concentration measured in the sample (mg/L). Two metals, zinc and nickel (blue boxes), were present in both replicates at ~1:1 ratio with the concentration of protein complex and absent from the buffer control.

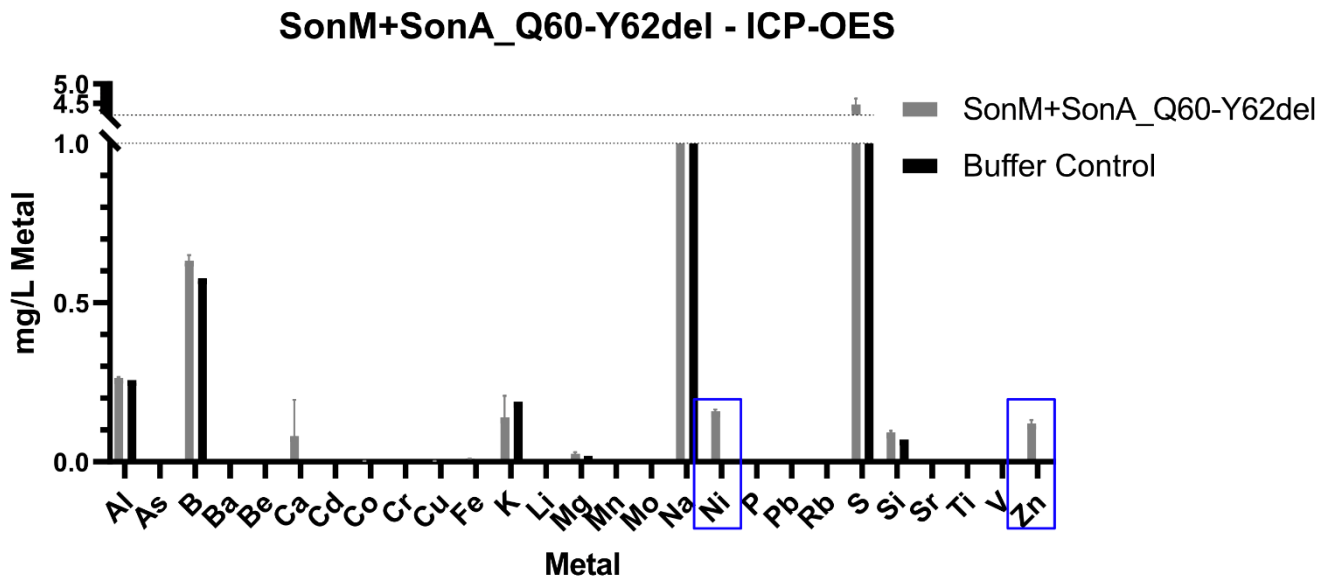

**Figure S4| SO1059 activity with alanine-*p*-nitroaniline.** Gene *so1059* was heterologously expressed and SO1059 was purified from *E. coli* and assayed with 1 mM alanine-4-nitroaniline in 50 mM HEPES buffer pH 8. Change in absorbance over time was monitored at 405 nm with reads every 10 seconds. Three technical replicates were performed for each condition (with and without SO1059). The average value is plotted with error bars representing the standard deviation between replicates. Triangle symbols were used to plot the absorbance for the reaction with SO1059. Circle symbols were used for the reaction without SO1059.

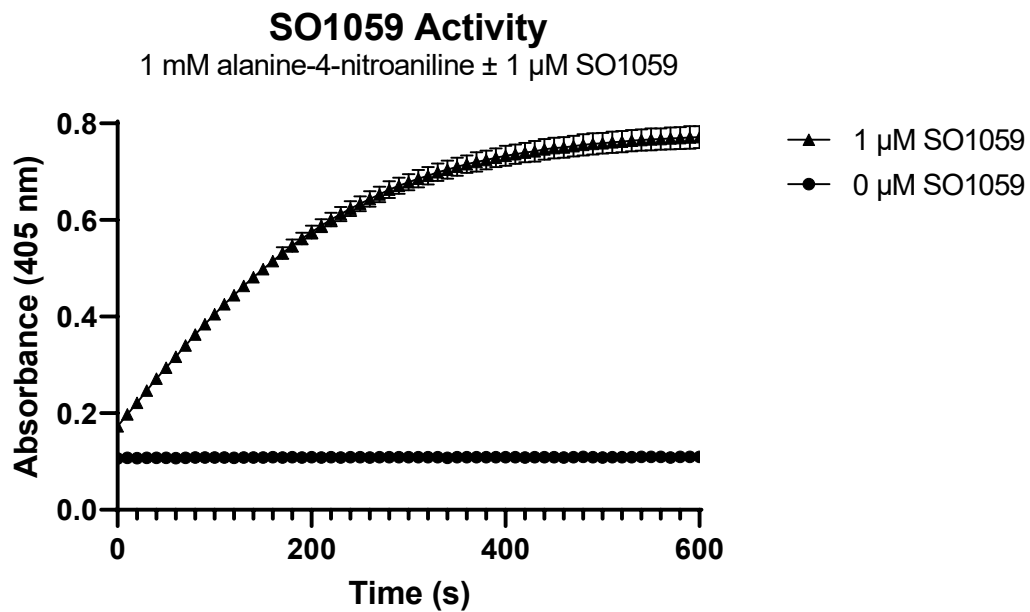

**Figure S5| Mass spectrometric analysis of SO1059 activity with trypsinized SonA-2Me.**

SO1059 was assayed for 50 hours in vitro with overnight trypsin digested SonA-2Me. (A) EIC from HPLC-MS of trypsin digested SonA-2Me with and without SO1059. Sequence is denoted to the right of the chromatogram, where methylated residues are shown in orange with an asterisk. (B) MS/MS spectra of the major species of trypsin digested SonA-2Me after 50-hour incubation at room temperature. (C) HPLC-MS/MS spectra of the major species of trypsin digested SonA-2Me after 50-hour incubation with SO1059 at room temperature. Primary amino acid sequences for the identified peptides are written above the spectra with confirmed (closed) or inferred (open) methylated residues circled (orange). Grey lines within the amino acid sequence denote the fragmentation with the masses written above (b-ions) and below (y-ions). Masses of fragments containing methylated residues are denoted with "Me" in brackets. A cut-off of 20 ppm was used. Difference (ppm) between expected and observed masses are in parentheses.

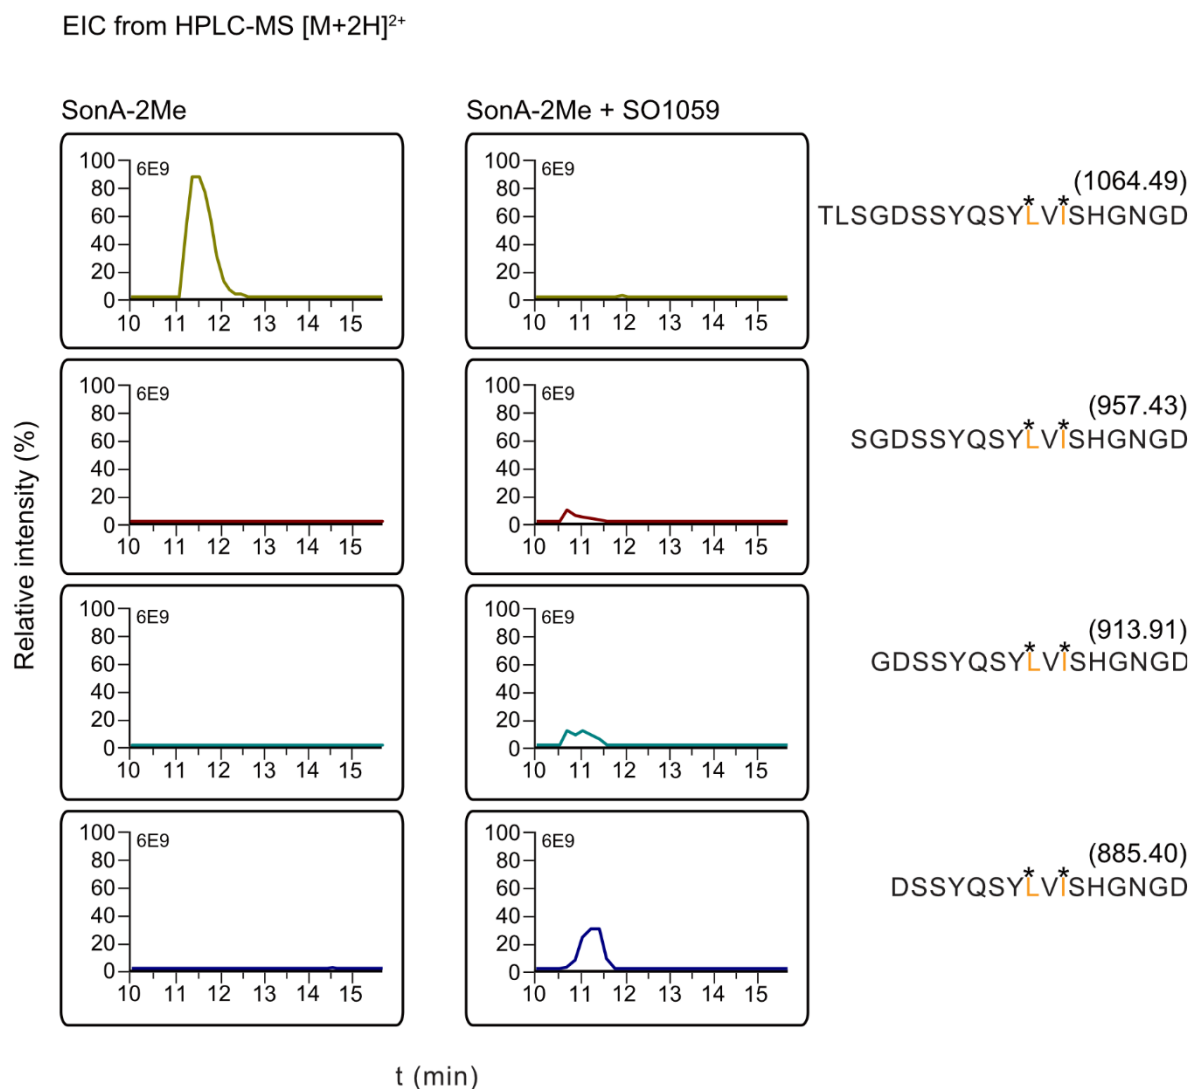



C

- Methylation localized by LC-MS/MS
- Methylation inferred by LC-MS/MS

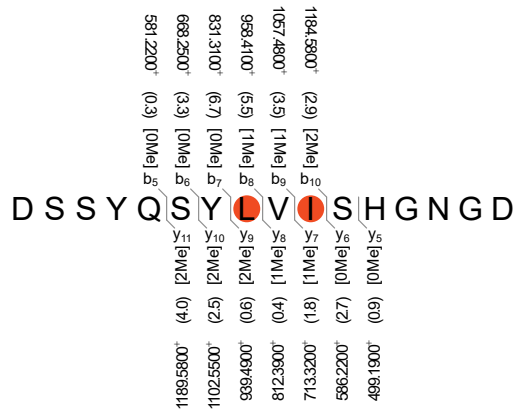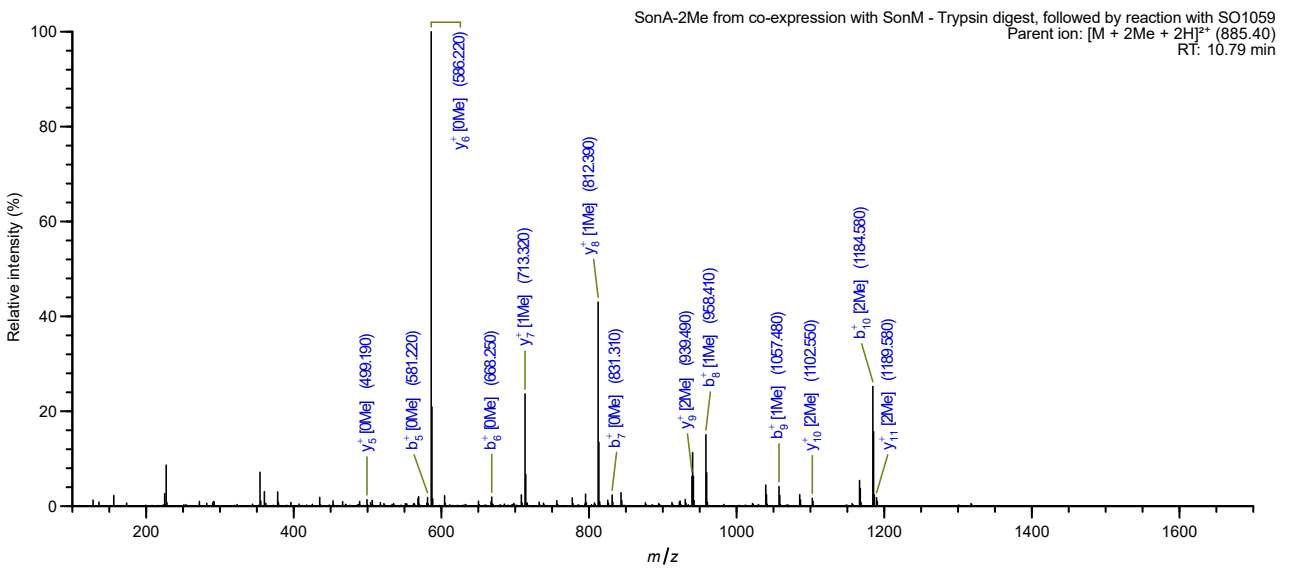

**Figure S6| Reverse transcription PCR for verification of native transcription conditions of *sonA*.** Extracted RNA was reverse transcribed to cDNA and then amplified with *sonM*- and *sonA*-specific primers. (A) RT-PCR data from *wt S. oneidensis* (WT), the *sonA* knockout strain (KO), and *sonM/A* overexpression strain (OE) cultured for 24 hours in two different media types, LB and SBM. (B) RT-PCR data from the *sonM* knockout strain cultured for 24 hours in SBM as compared to positive control.

A)

PCR check for *sonM/A*

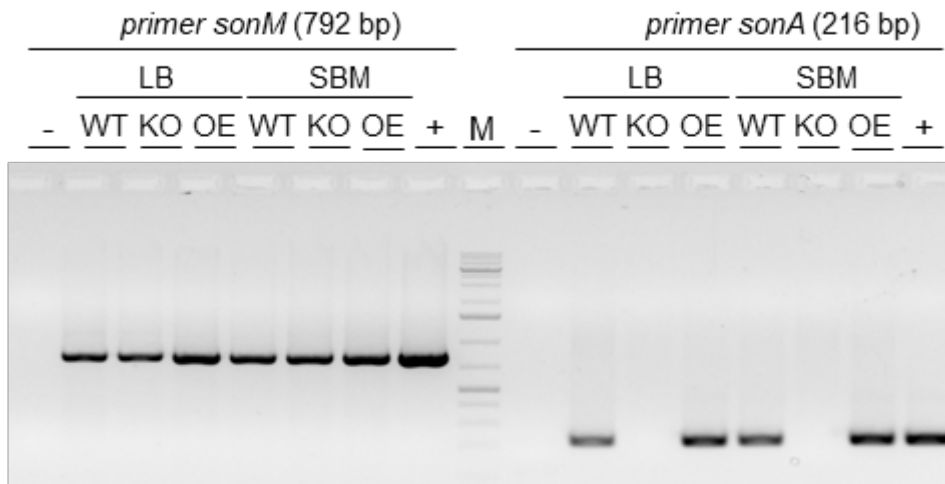

Template: 1.5  $\mu$ L cDNA  
 Reaction vol. 15  $\mu$ L  
 Q5 DNA polymerase  
 Tm: 64  $^{\circ}$ C

- : no template  
 + : pBBR1-*sonM/A*-C  
 M : DNA marker

B)

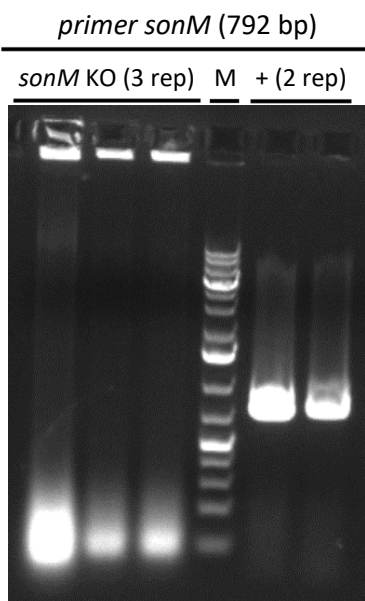



**Figure S7| Mass spectrometric identification of the SonA core peptide.** (A) EIC from HPLC-MS of the identified SonA core peptide 56-DSSYL<sub>Me</sub>VI<sub>Me</sub>SHGNGD-71. The strain is denoted to the right of the chromatogram. The retention time for the mass 885.4 is consistent in both the wt and overexpression strains and absent from the knockout strains. MS/MS spectra of the identified mass from wt (B) and overexpression (C) extracts. Primary amino acid sequences for the identified peptides are written above the spectra with confirmed (closed) or inferred (open) methylated residues circled (orange). Grey lines within the amino acid sequence denote the fragmentation with the masses written above (b-ions) and below (y-ions). Masses of fragments containing methylated residues are denoted with “Me” in brackets. A cut-off of 10 ppm was used. Difference (ppm) between expected and observed masses are in parentheses.

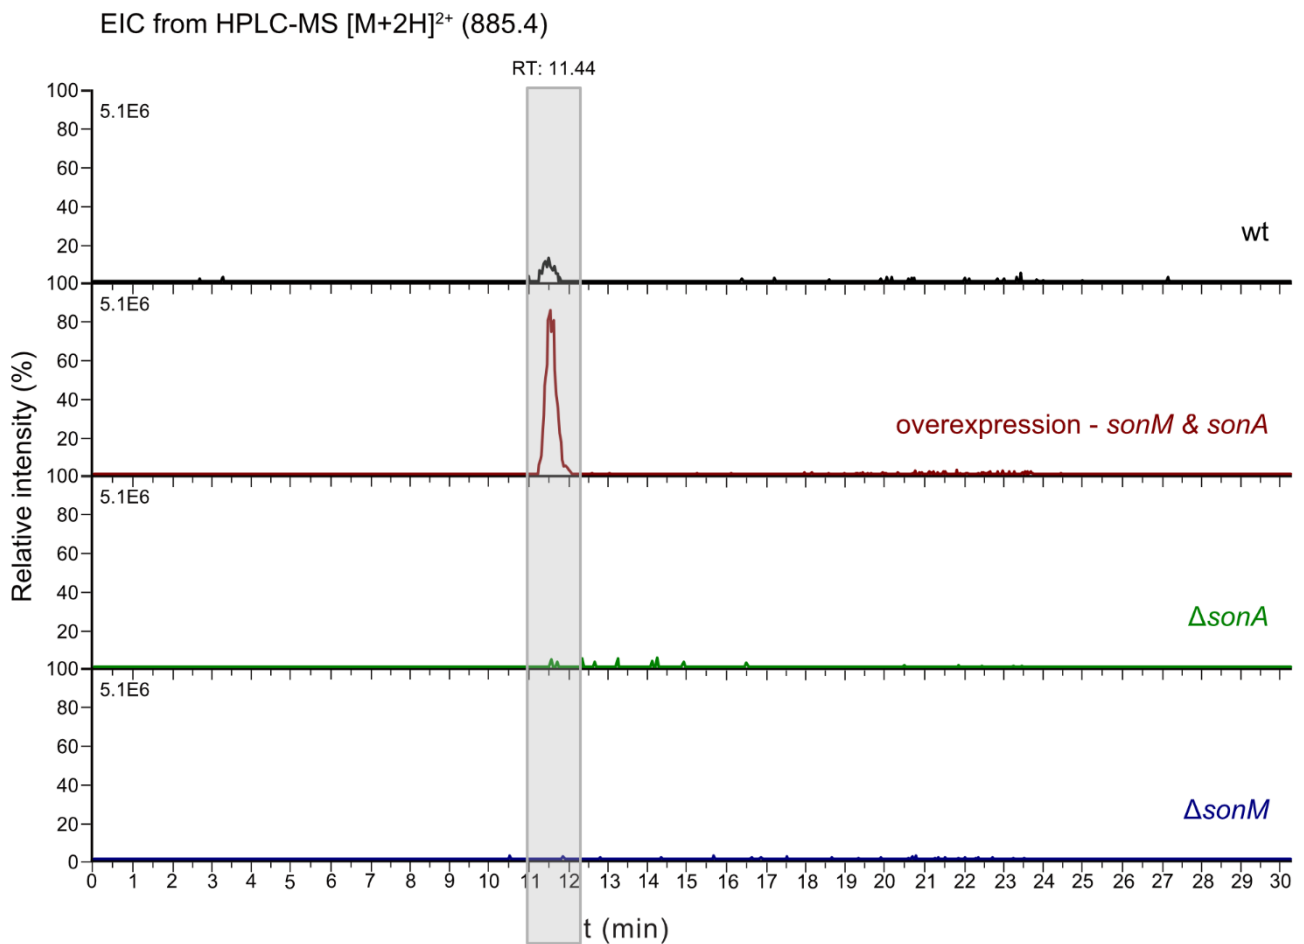

B

- Methylation localized by LC-MS/MS
- Methylation inferred by LC-MS/MS

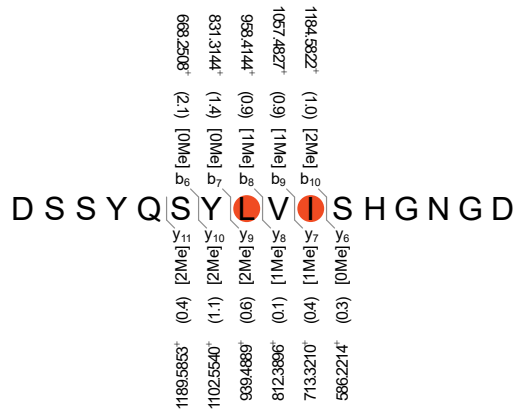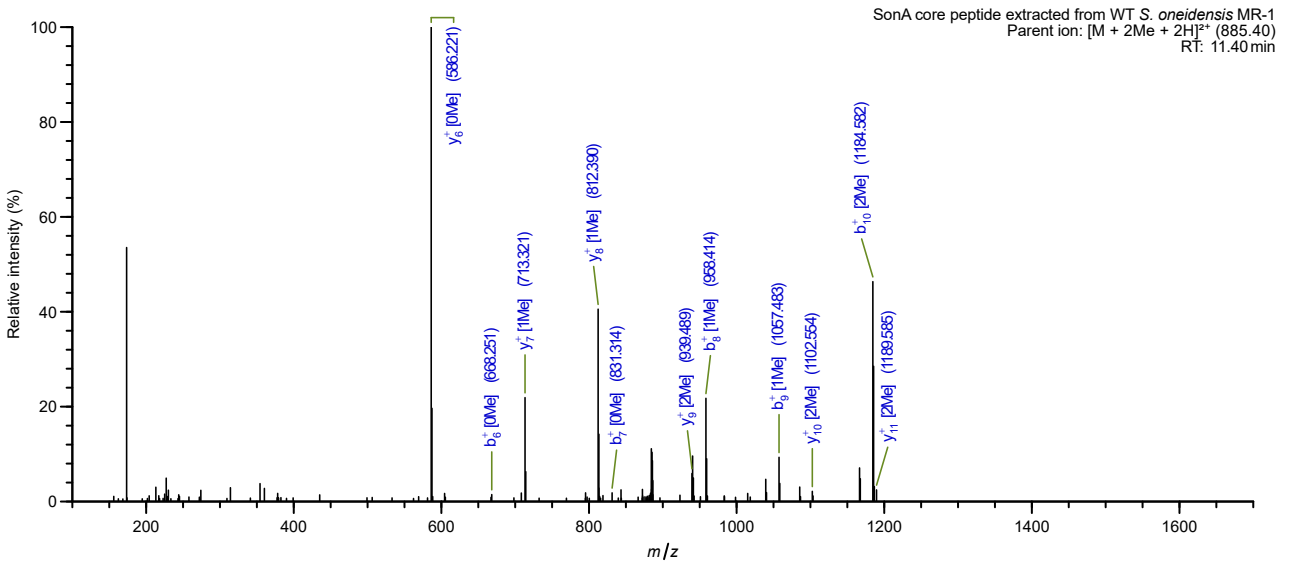

C

- Methylation localized by LC-MS/MS
- Methylation inferred by LC-MS/MS

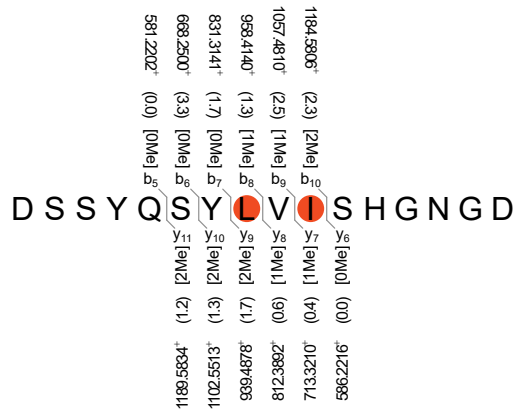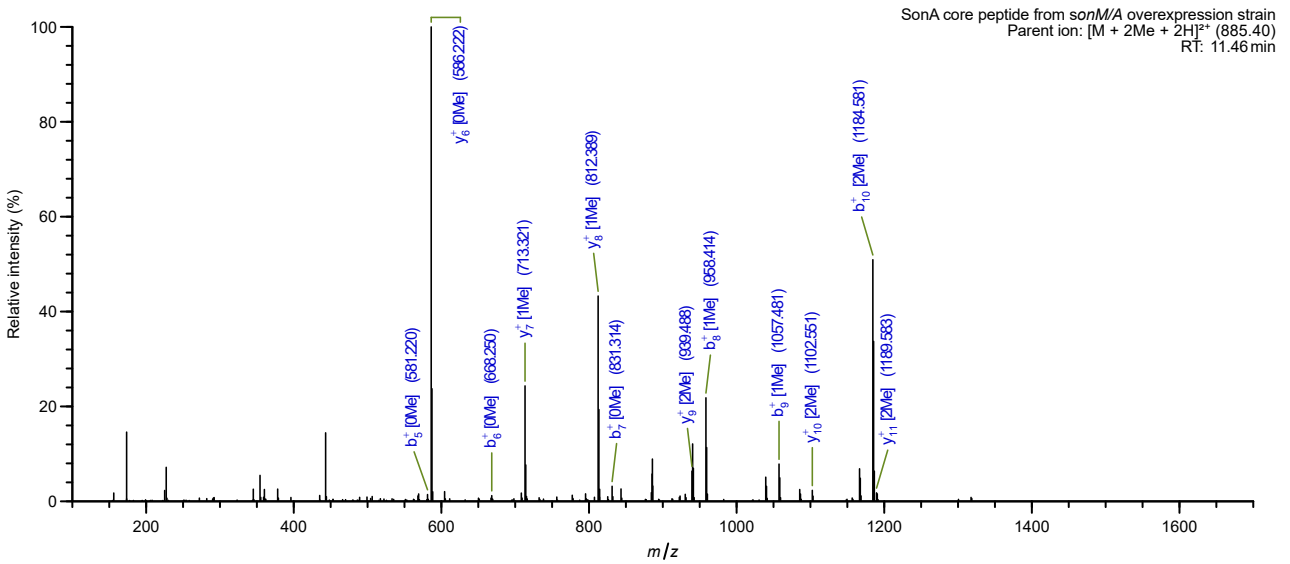

**Figure S8| Retention time and mass spectrometric analysis of 1, heterologously produced in *E. coli*.** (A) The EIC from HPLC-MS of Shewanellamide A (**1**) heterologously produced in *E. coli* was compared between wt extract (black), co-injection of wt extract and **1** (blue), and **1** (purple). (B) MS/MS spectra of **1**. The primary amino acid sequence for the identified peptide is written above the spectra with confirmed (closed) or inferred (open) methylated residues circled (orange). Grey lines within the amino acid sequence denote the fragmentation with the masses written above (b-ions) and below (y-ions). Masses of fragments containing methylated residues are denoted with “Me” in brackets. A cut-off of 10 ppm was used. Difference (ppm) between expected and observed masses are in parentheses.

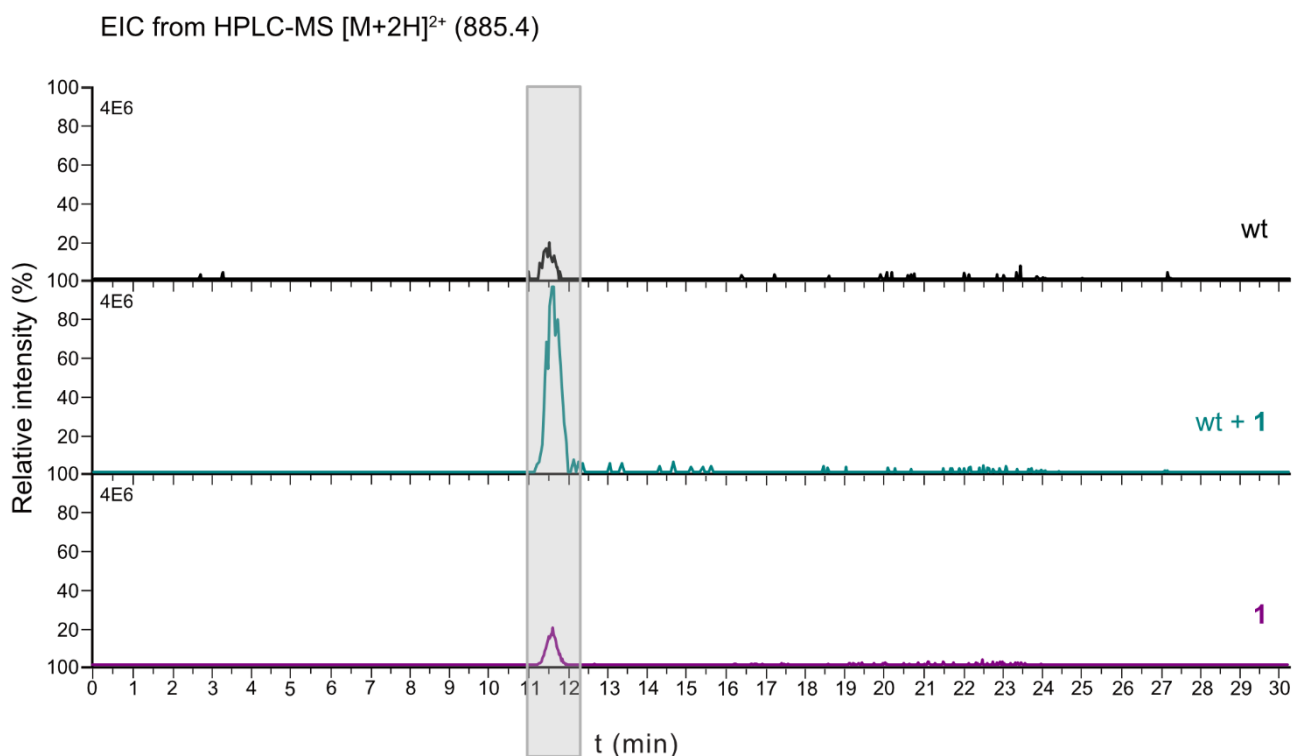



**Figure S9| NMR peak table and spectra of 1. (A) COSY (B) HMBC (C) HSQC (D) ROESY (E) TOCSY.**

| AA                     | position                    | $\delta_C$ , type           | $\delta_H$ , (J in Hz) | HMBC from H to C                  | AA                          | position                | $\delta_C$ , type      | $\delta_H$ , (J in Hz)       | HMBC from H to C       |   |
|------------------------|-----------------------------|-----------------------------|------------------------|-----------------------------------|-----------------------------|-------------------------|------------------------|------------------------------|------------------------|---|
| <b>Asp<sup>1</sup></b> | 1                           | 172.29, C                   | -                      | -                                 | <b>Val<sup>9</sup></b>      | 1                       | 177.70, C              | -                            | -                      |   |
|                        | 2                           | 53.55, CH                   | 4.32, m                | -                                 |                             | 2                       | 58.47, CH              | 4.48, m                      | -                      |   |
|                        | 3                           | 39.65, CH <sub>2</sub>      | 2.83, m                | 172.29, 178.98, 53.55             |                             | 3                       | 33.12, CH              | 2.00, m                      | 20.69, 21.15, 58.47    |   |
|                        | 4                           | 178.98, C                   | 2.89, m                | 172.29, 178.98, 53.55             |                             | 4                       | 20.69, CH <sub>3</sub> | 0.86, m                      | 21.15, 33.12, 58.47    |   |
|                        | $\alpha$ -NH <sub>3</sub>   | -                           | n. o.                  | -                                 |                             | 4'                      | 21.15, CH <sub>3</sub> | 0.93, d (6.7)                | 20.69, 33.12, 58.47    |   |
|                        |                             |                             |                        | $\alpha$ -NH                      | -                           | 8.00, d (7.3)           | 175.29, 58.27, 33.12   |                              |                        |   |
| <b>Ser<sup>2</sup></b> | 1                           | 174.47, C                   | -                      | -                                 | <b>Ile<sup>10</sup></b>     | 1                       | 174.64, C              | -                            | -                      |   |
|                        | 2                           | 57.90, CH                   | 4.54, m                | -                                 |                             | 2                       | 63.55, CH              | 4.768, m                     | -                      |   |
|                        | 3                           | 64.00, CH <sub>2</sub>      | 3.86, m                | 58.15, 174.47                     |                             | 3                       | 34.49, CH              | 2.04, m                      | 58.27,                 |   |
|                        | $\alpha$ -NH                | -                           | 8.78, d (7.1)          | 172.29, 64.00, 57.90              |                             | 4                       | 26.88, CH <sub>2</sub> | 1.29, m                      | -                      |   |
| <b>Ser<sup>3</sup></b> | 1                           | 174.78, C                   | -                      | -                                 |                             | 5                       | 12.18, CH <sub>3</sub> | 0.80, m                      | 63.55                  |   |
|                        | 2                           | 58.80, CH                   | 4.41, m                | -                                 |                             | 6                       | 17.29, CH <sub>3</sub> | 0.81, m                      | 63.55                  |   |
|                        | 3                           | 63.03, CH <sub>2</sub>      | 3.82, m                | 58.80, 174.78                     | $\alpha$ -N-CH <sub>3</sub> | 33.98, CH <sub>3</sub>  | 3.17, s                | 177.7                        |                        |   |
|                        | $\alpha$ -NH                | -                           | 8.40, d (6.6)          | 174.47, 63.03, 58.80              | <b>Ser<sup>11</sup></b>     | 1                       | 174.44, C              | -                            | -                      |   |
| <b>Tyr<sup>4</sup></b> | 1                           | 175.65, C                   | -                      | -                                 |                             | 2                       | 58.04, CH              | 4.39, m                      | -                      |   |
|                        | 2                           | 58.60, CH                   | 4.55, m                | -                                 |                             | 3                       | 64.58, CH <sub>2</sub> | 3.77, m                      | 58.04, 174.64          |   |
|                        | 3                           | 38.95, CH <sub>2</sub>      | 2.98, m                | 58.20, 130.56, 133.45, 175.65     | $\alpha$ -NH                | -                       | 8.38, d (6.6)          | 174.64, 64.58, 58.04         |                        |   |
|                        | 4                           | 130.56, C                   | 3.02, m                | 58.20, 130.56, 133.45, 175.65     | <b>His<sup>12</sup></b>     | 1                       | 174.60, C              | -                            | -                      |   |
|                        | 5, 9                        | 133.45, CH                  | 7.10, d (8.9)          | 157.7, 133.45, 118.44, 39.11      |                             | 2                       | 55.12, CH              | 4.808, m                     | -                      |   |
|                        | 6, 8                        | 118.44, CH                  | 6.82, d (8.9)          | 157.7, 130.56, 118.44             |                             | 3                       | 29.34, CH <sub>2</sub> | 3.18, m                      | 131.25, 120.40, 174.60 |   |
|                        | 7                           | 157.7, C                    | -                      | -                                 |                             | 4                       | 131.25, C              | -                            | -                      |   |
|                        | $\alpha$ -NH                | -                           | 8.15, m                | 174.78                            |                             | 5                       | 120.40, CH             | 7.32, s                      | 136.51, 131.25         |   |
|                        | OH                          | -                           | -                      | -                                 |                             | 6 $\epsilon$ -NH        | -                      | n. o.                        | -                      |   |
|                        |                             |                             |                        | 7                                 |                             | 136.51, CH              | 8.60, m                | 131.7, 120.8                 |                        |   |
| <b>Gln<sup>5</sup></b> | 1                           | 175.17, C                   | -                      | -                                 | $\alpha$ -NH                | -                       | 8.68, d (7.1)          | 174.44, 55.12, 29.34         |                        |   |
|                        | 2                           | 55.89, CH                   | 4.27, m                | -                                 | <b>Gly<sup>13</sup></b>     | 1                       | 174.12, C              | -                            | -                      |   |
|                        | 3                           | 29.77, CH <sub>2</sub>      | 1.89, m                | 33.88, 55.89, 175.17, 180.73      |                             | 2                       | 45.46, CH <sub>2</sub> | 3.99, m                      | 174.12                 |   |
|                        | 4                           | 33.88, CH <sub>2</sub>      | 1.98, m                | 33.88, 55.89, 175.17, 180.73      |                             | $\alpha$ -NH            | -                      | 3.99, m                      | 174.12                 |   |
|                        | 5                           | 180.73, C                   | 2.21, m                | 29.77, 55.89, 180.73              |                             |                         | 8.47, m                | 174.12                       |                        |   |
|                        |                             | $\epsilon$ -NH <sub>2</sub> | -                      | 6.83 m                            | -                           | <b>Asn<sup>14</sup></b> | 1                      | 174.30, C                    | -                      | - |
|                        |                             | $\alpha$ -NH                | -                      | 7.45 s                            | -                           |                         | 2                      | 53.41, CH                    | 4.75, m                | - |
|                        |                             | -                           | 8.16, m                | 175.65                            | 3                           |                         | 39.65, CH <sub>2</sub> | 2.78, m                      | 174.30, 177.91, 53.41  |   |
|                        |                             | -                           | -                      | -                                 | 4                           |                         | 177.91, C              | 2.86, m                      | 174.30, 177.91, 53.41  |   |
|                        |                             | -                           | -                      | -                                 | 5 $\delta$ -NH <sub>2</sub> |                         | -                      | 6.90, s                      | -                      |   |
| <b>Ser<sup>6</sup></b> | 1                           | 173.14, C                   | -                      | -                                 | $\alpha$ -NH                | -                       | 7.59, s                | -                            |                        |   |
|                        | 2                           | 58.36, CH                   | 4.36, m                | -                                 | $\alpha$ -NH                | -                       | 8.50, d (7.6)          | 177.91, 174.30, 53.41, 39.65 |                        |   |
|                        | 3                           | 64.00, CH <sub>2</sub>      | 3.76, m                | 58.36, 173.14                     | <b>Gly<sup>15</sup></b>     | 1                       | 173.3, C               | -                            | -                      |   |
|                        | $\alpha$ -NH                | -                           | 8.13, d (7.2)          | 175.17                            |                             | 2                       | 45.54, CH <sub>2</sub> | 3.90, m                      | 173.3                  |   |
|                        |                             | -                           | -                      | $\alpha$ -NH                      |                             | -                       | 4.02, m                | 173.3                        |                        |   |
| <b>Tyr<sup>7</sup></b> | 1                           | 175.70, C                   | -                      | -                                 |                             |                         | 8.47, m                | 173.3                        |                        |   |
|                        | 2                           | 54.41, CH                   | 5.02, m                | -                                 | <b>Asp<sup>16</sup></b>     | 1                       | 175.35 C               | -                            | -                      |   |
|                        | 3                           | 39.11, CH <sub>2</sub>      | 2.90, m                | 54.41, 130.56, 133.45, 175.70     |                             | 2                       | 53.88, CH              | 4.576, m                     | -                      |   |
|                        | 4                           | 130.56, C                   | 2.99, m                | 54.41, 130.56, 133.45, 175.70     |                             | 3                       | 39.65, CH <sub>2</sub> | 2.79, m                      | 178.59, 175.35, 53.88  |   |
|                        | 5, 9                        | 133.45, CH                  | 7.12, d (8.9)          | 157.7, 133.45, 118.44, 39.11      |                             | 4                       | 178.59, C              | 2.85, m                      | 178.59, 175.35, 53.88  |   |
|                        | 6, 8                        | 118.44, CH                  | 6.80, d (8.9)          | 157.7, 130.56, 118.44             | $\alpha$ -NH                | -                       | -                      | -                            |                        |   |
|                        | 7                           | 157.7, C                    | -                      | -                                 | $\alpha$ -NH                | -                       | 8.00, d (7.3)          | 173.3, 53.88                 |                        |   |
|                        | $\alpha$ -NH                | -                           | 8.24, d (7.6)          | 173.14                            |                             |                         |                        |                              |                        |   |
|                        | OH                          | -                           | -                      | -                                 |                             |                         |                        |                              |                        |   |
|                        |                             |                             |                        |                                   |                             |                         |                        |                              |                        |   |
| <b>Leu<sup>8</sup></b> | 1                           | 175.29, C                   | -                      | -                                 |                             |                         |                        |                              |                        |   |
|                        | 2                           | 58.29, CH                   | 4.97, m                | -                                 |                             |                         |                        |                              |                        |   |
|                        | 3                           | 39.61, CH <sub>2</sub>      | 1.57, m                | 24.0, 24.98, 27.13, 58.29, 175.29 |                             |                         |                        |                              |                        |   |
|                        | 4                           | 27.13, CH                   | 1.31, m                | 24.00, 24.98                      |                             |                         |                        |                              |                        |   |
|                        | 5                           | 24.00, CH <sub>3</sub>      | 0.81, m                | 24.98, 27.13, 39.61               |                             |                         |                        |                              |                        |   |
|                        | 5'                          | 24.98, CH <sub>3</sub>      | 0.87, m                | 24.00, 27.13, 39.61               |                             |                         |                        |                              |                        |   |
|                        | $\alpha$ -N-CH <sub>3</sub> | 34.09, CH <sub>3</sub>      | 2.91, s                | 58.29, 173.08, 175.29, 175.70     |                             |                         |                        |                              |                        |   |

A COSY spectrum of 1

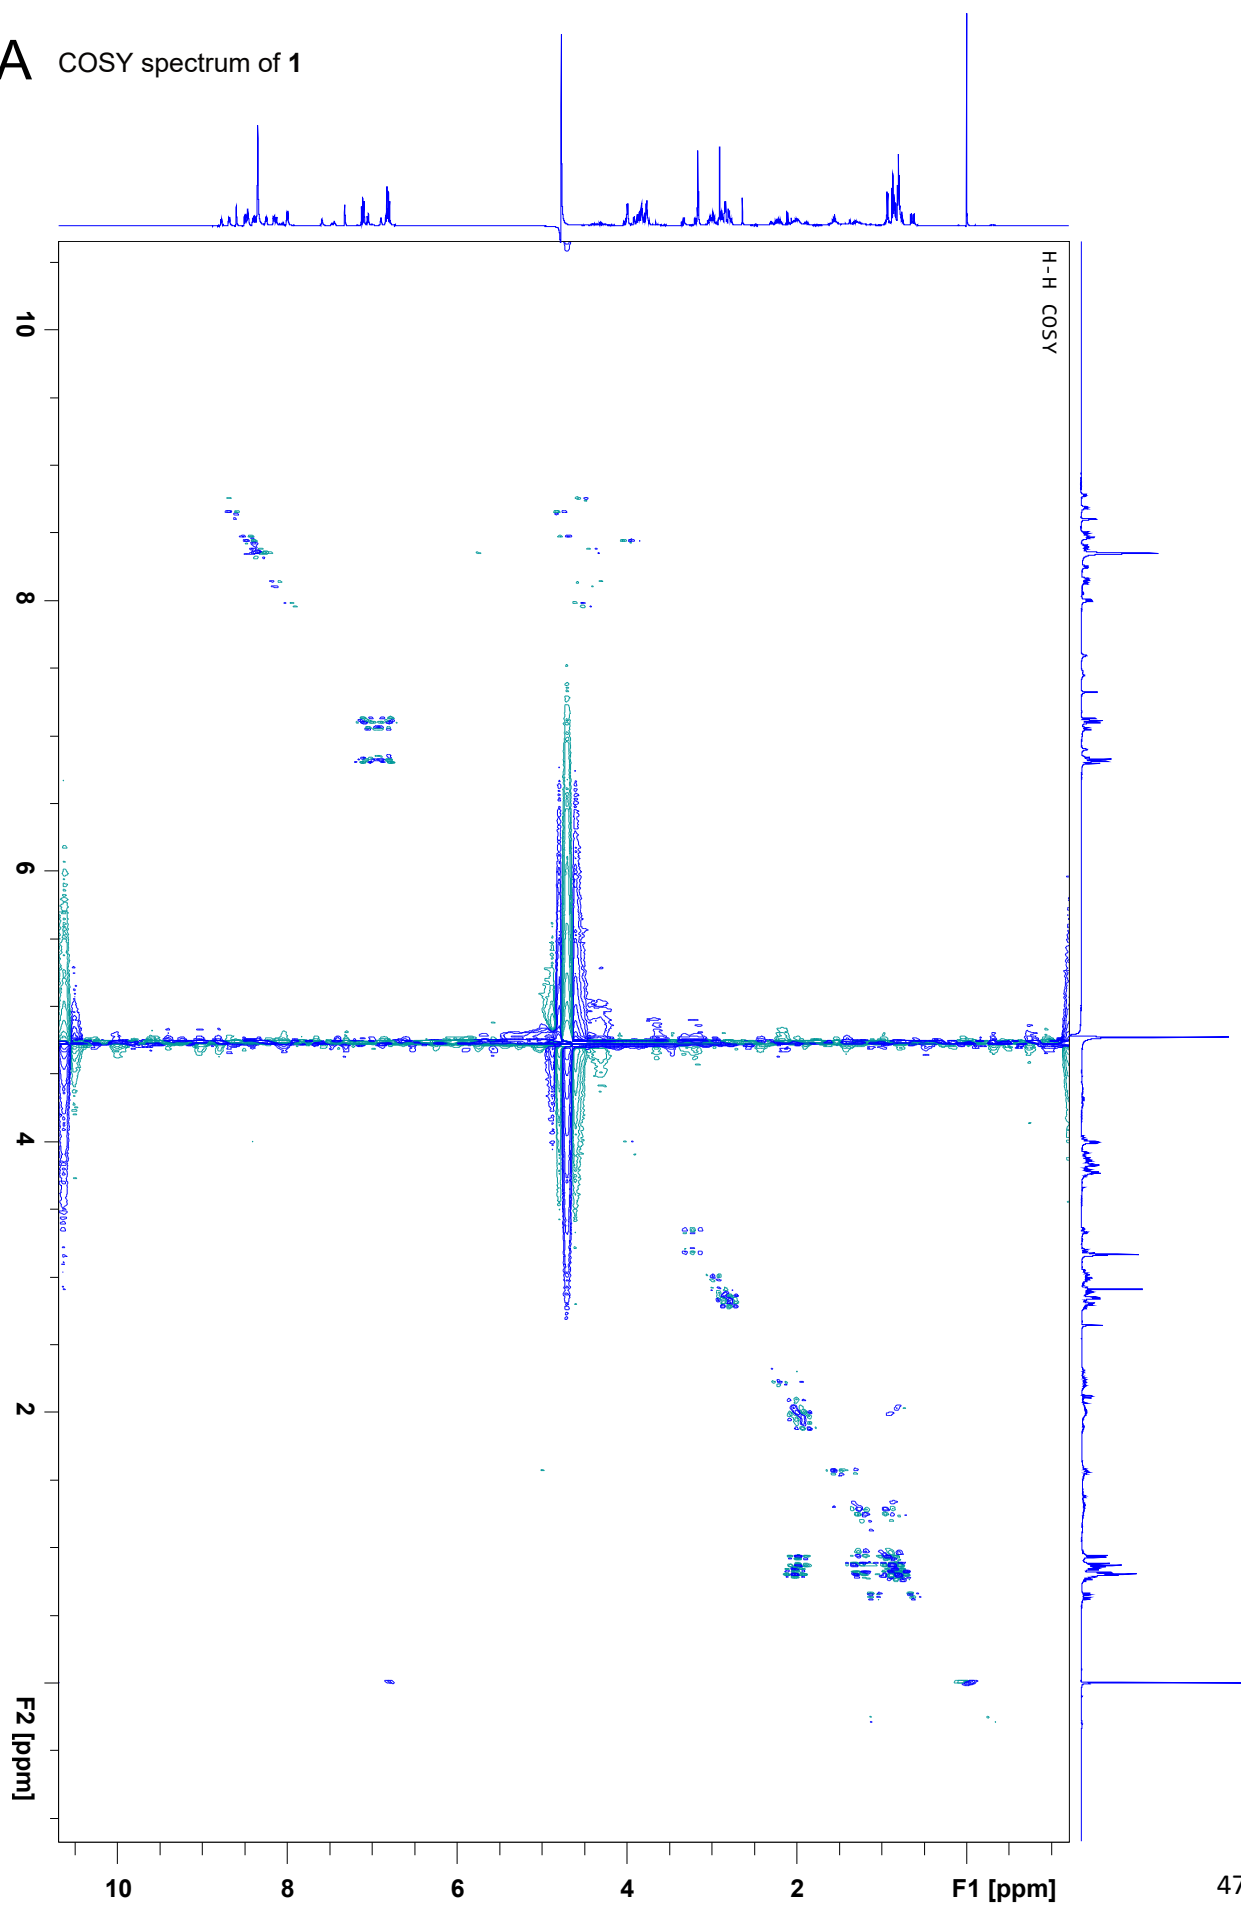

**B** HMBC spectrum of **1**

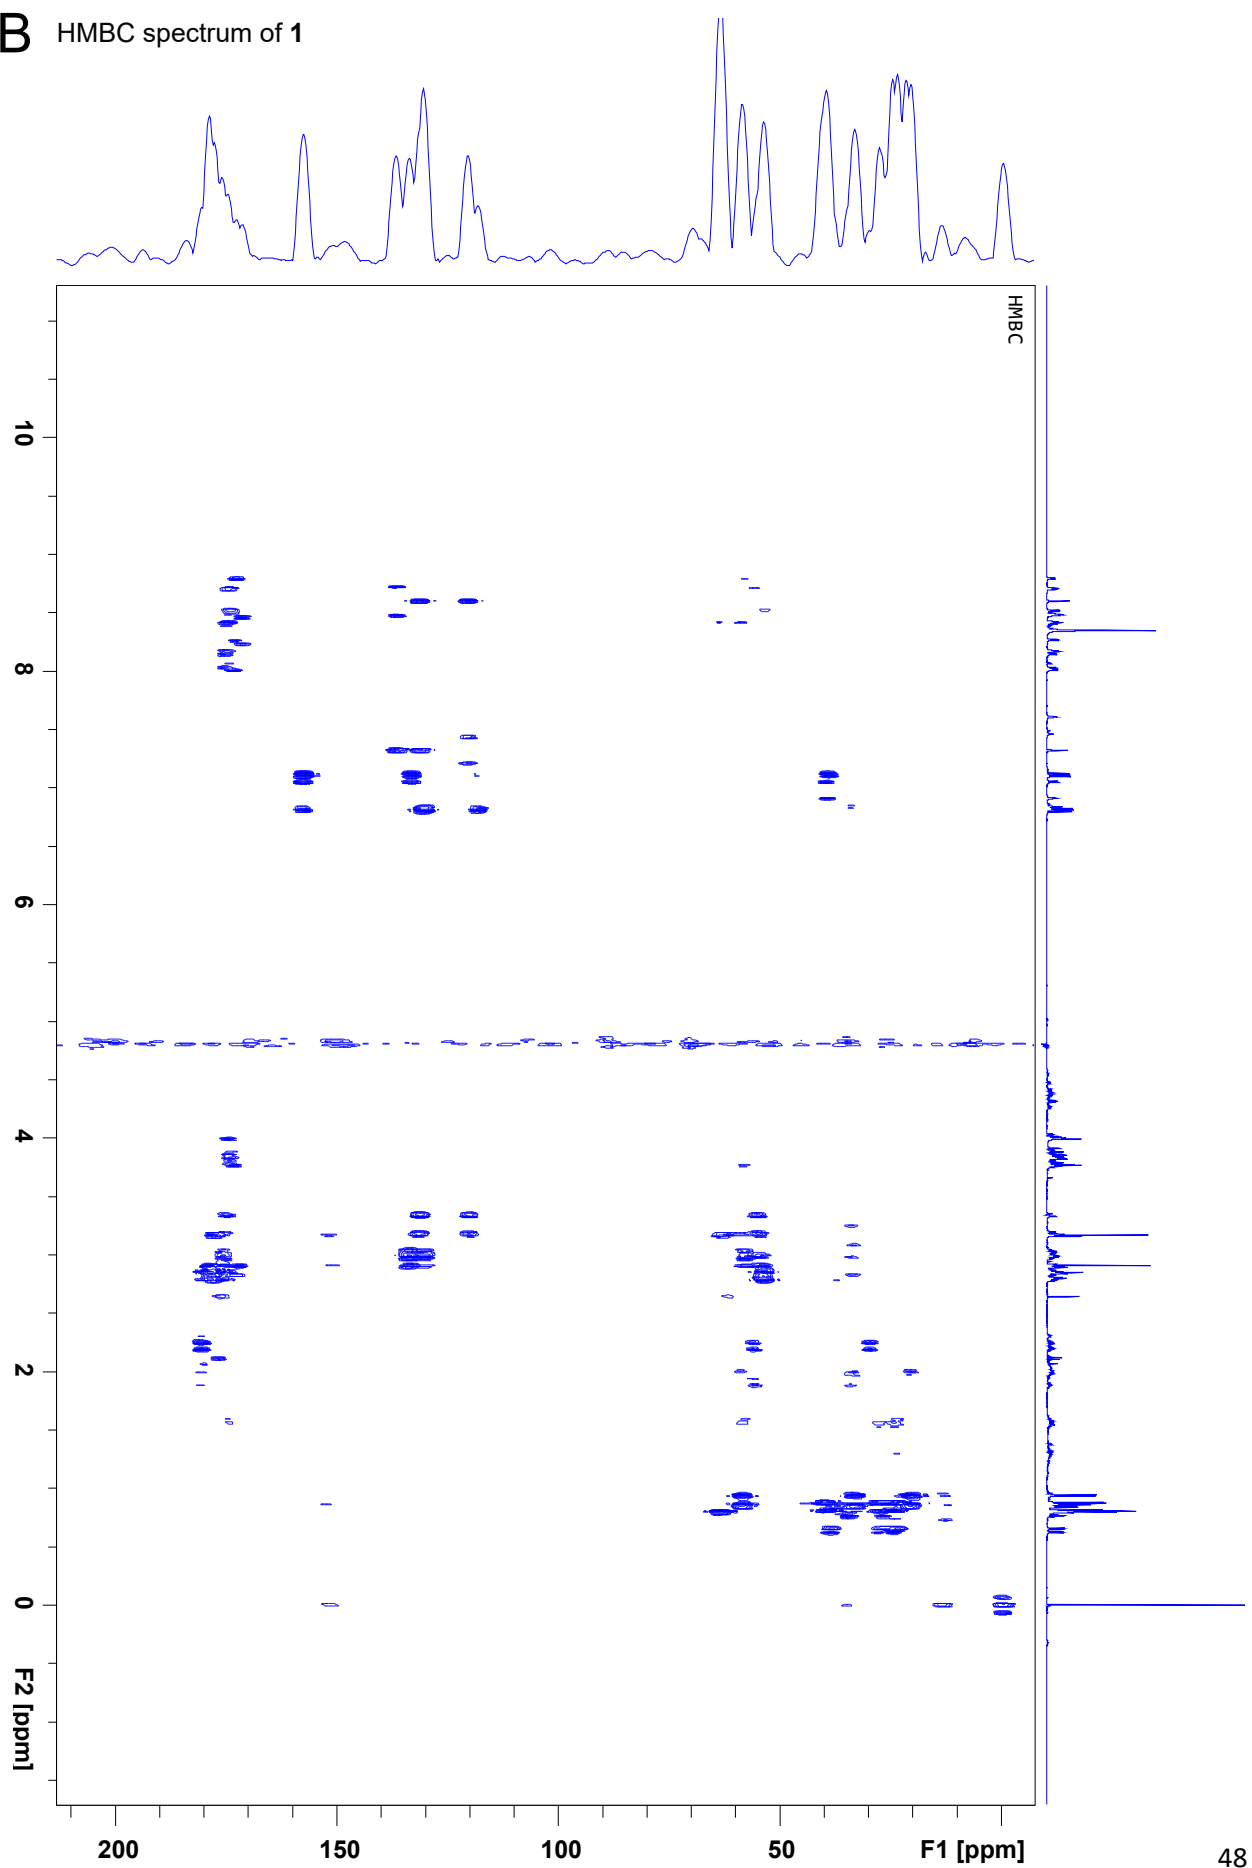



C HSQC spectrum of 1

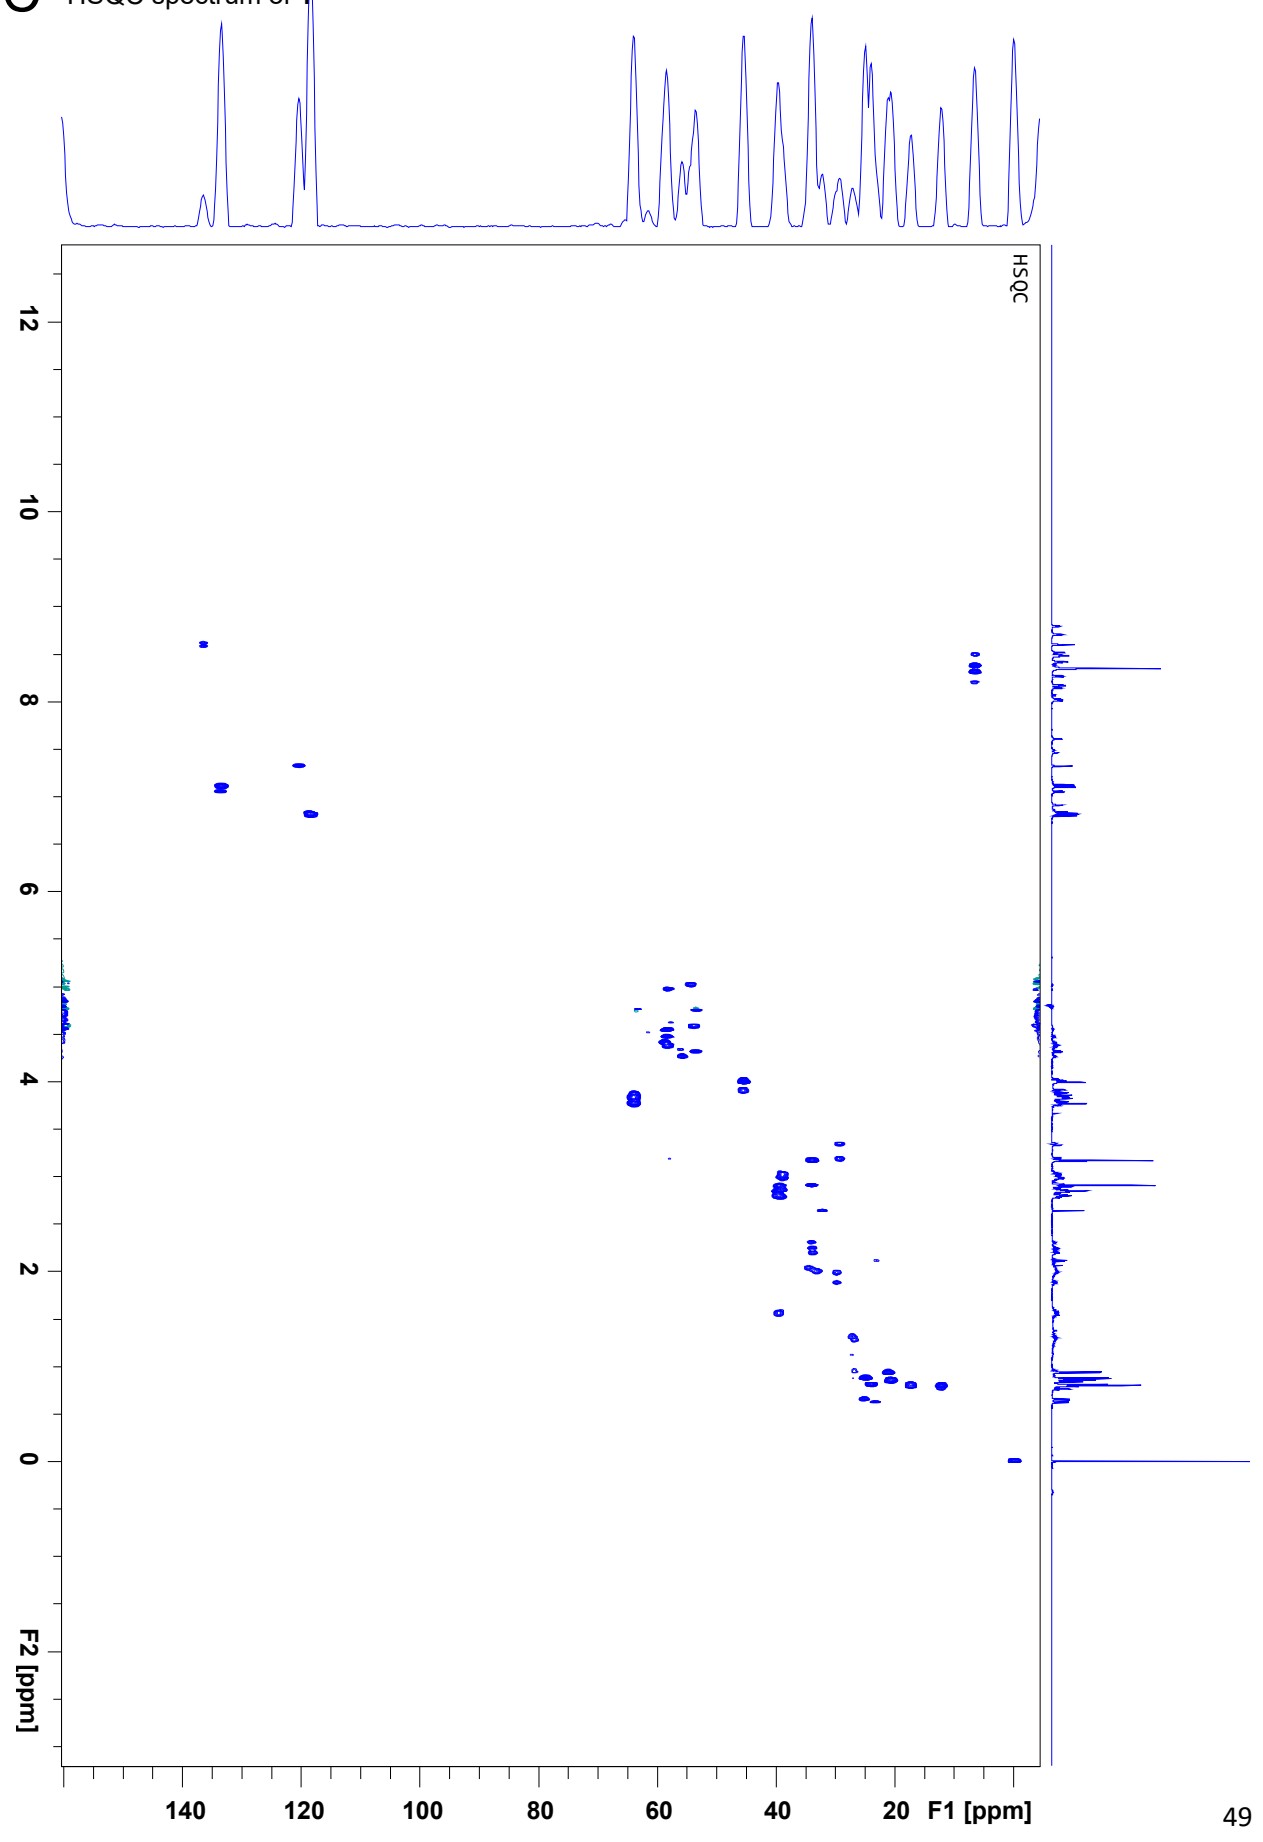

D ROESY spectrum of 1

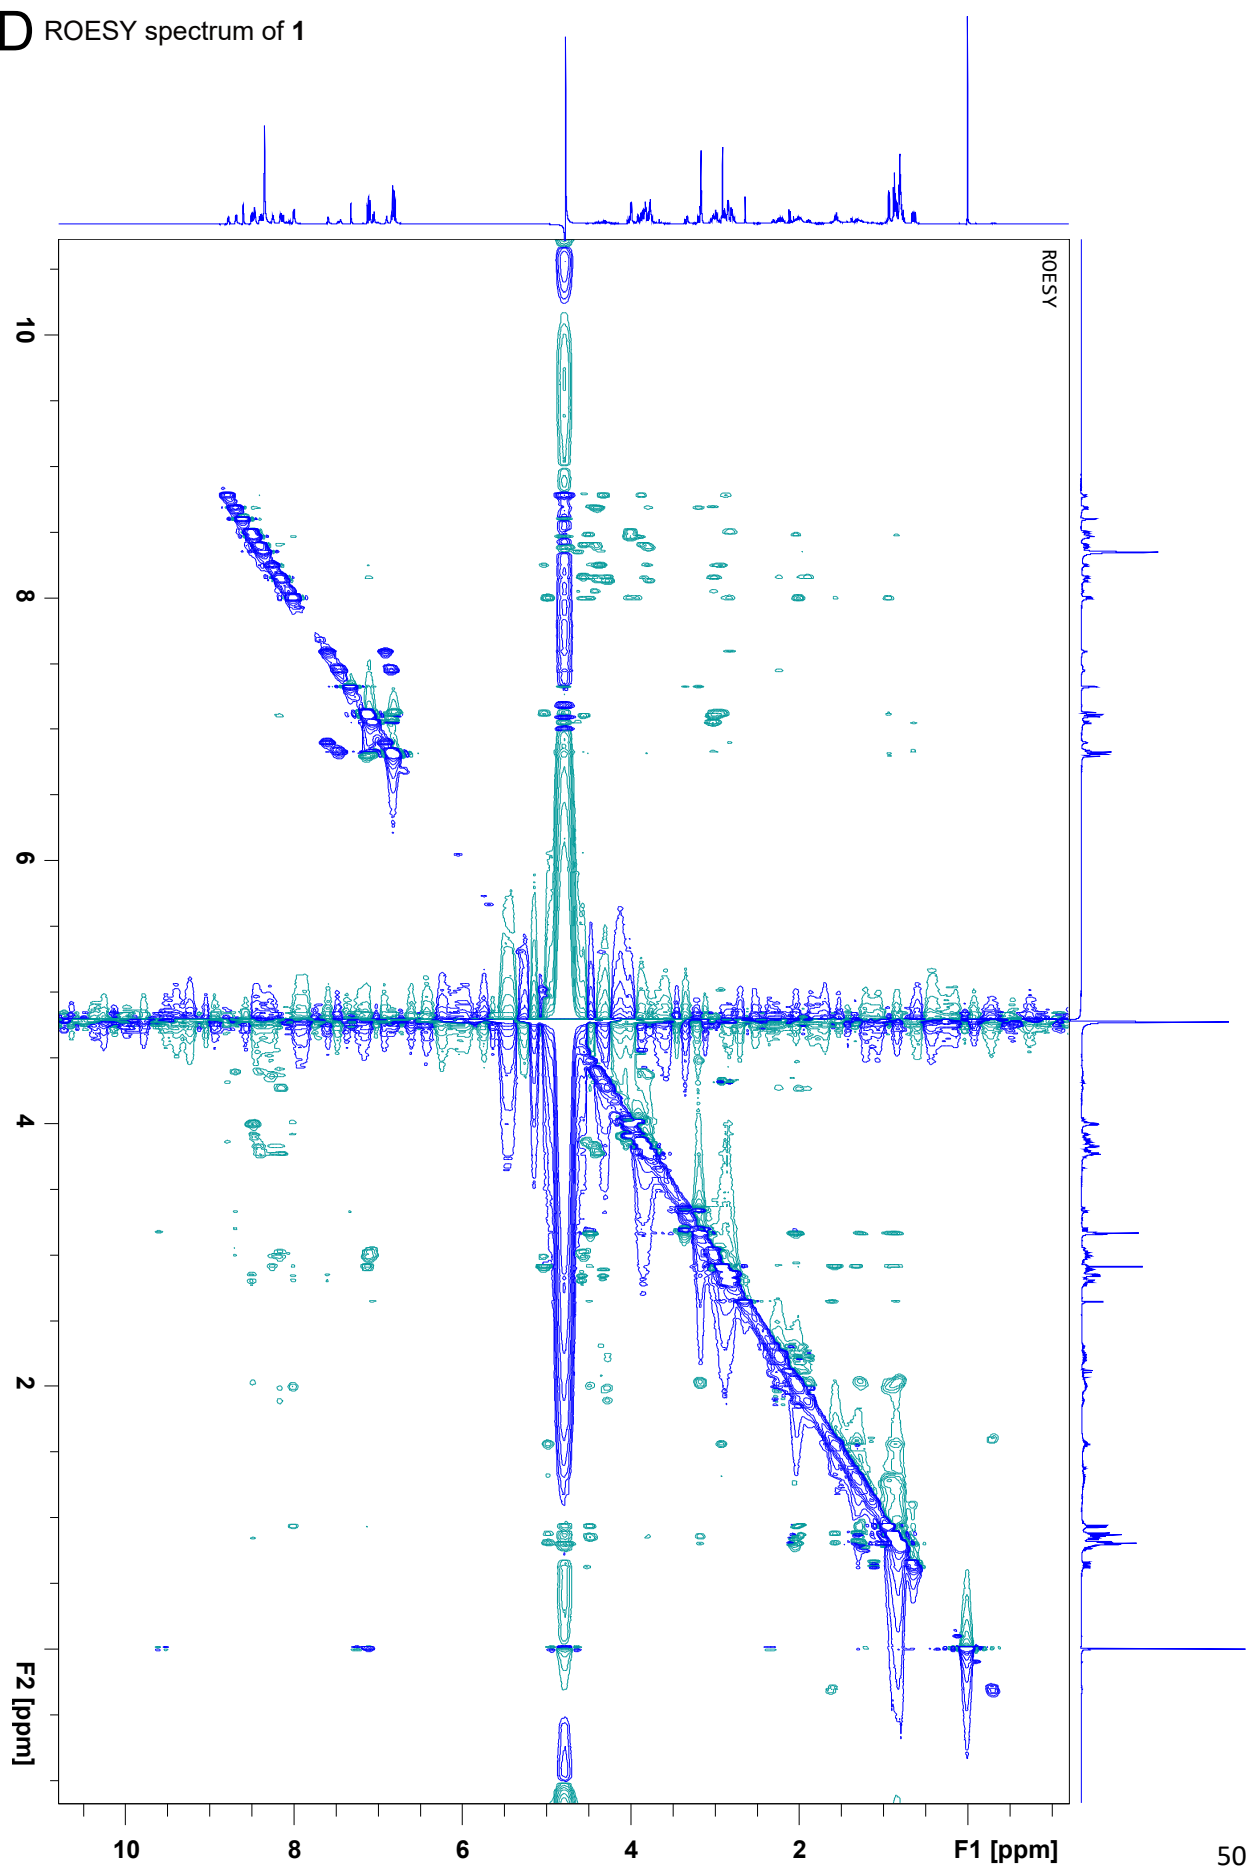

**E** TOCSY spectrum of **1**

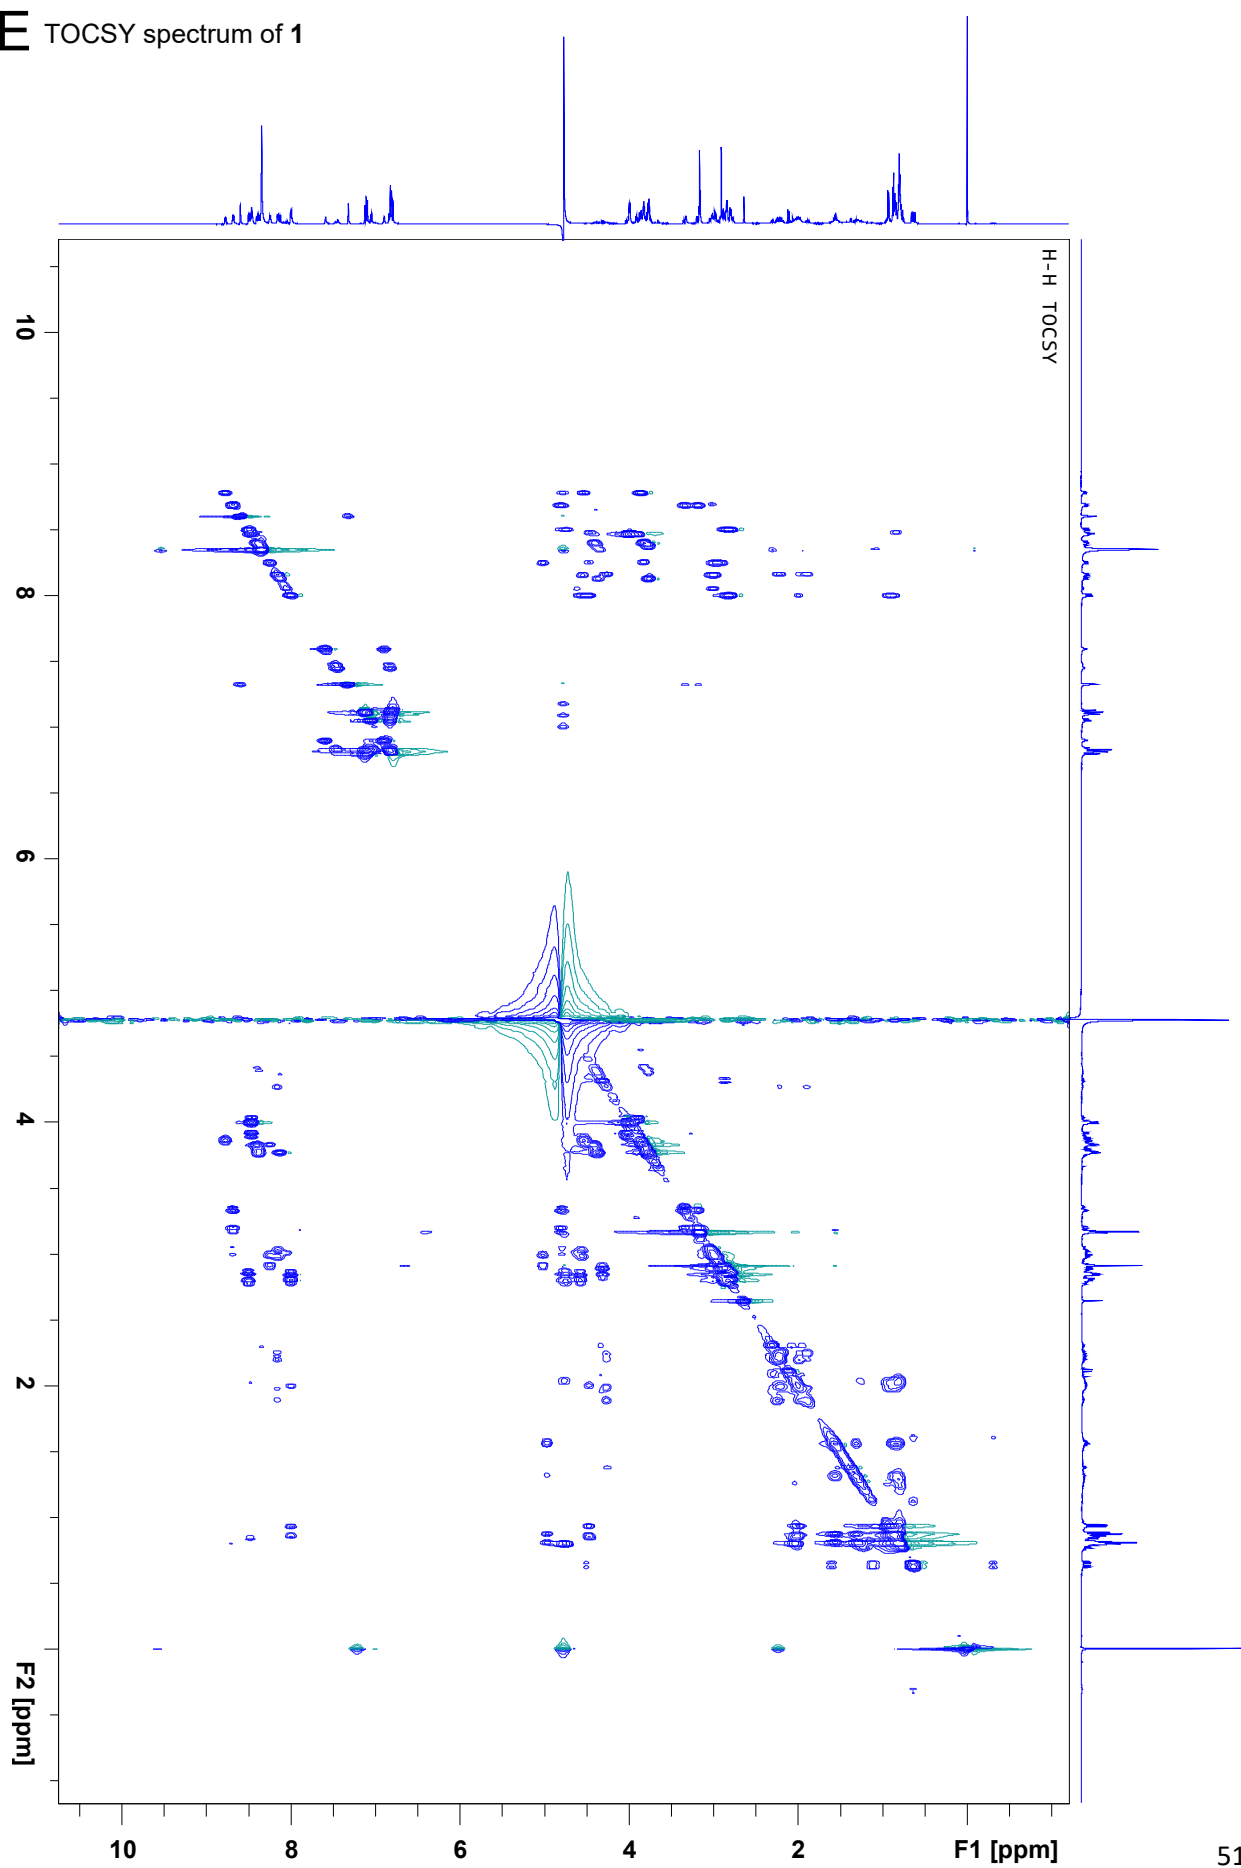

**Figure S10| Extracted ion chromatogram for Marfey's analysis of 1.** EIC from HPLC-MS of Shewanellamide A compared with amino acid standards derivatized under identical conditions. Relative peak intensities and retention times for the same masses are plotted in matching colors.

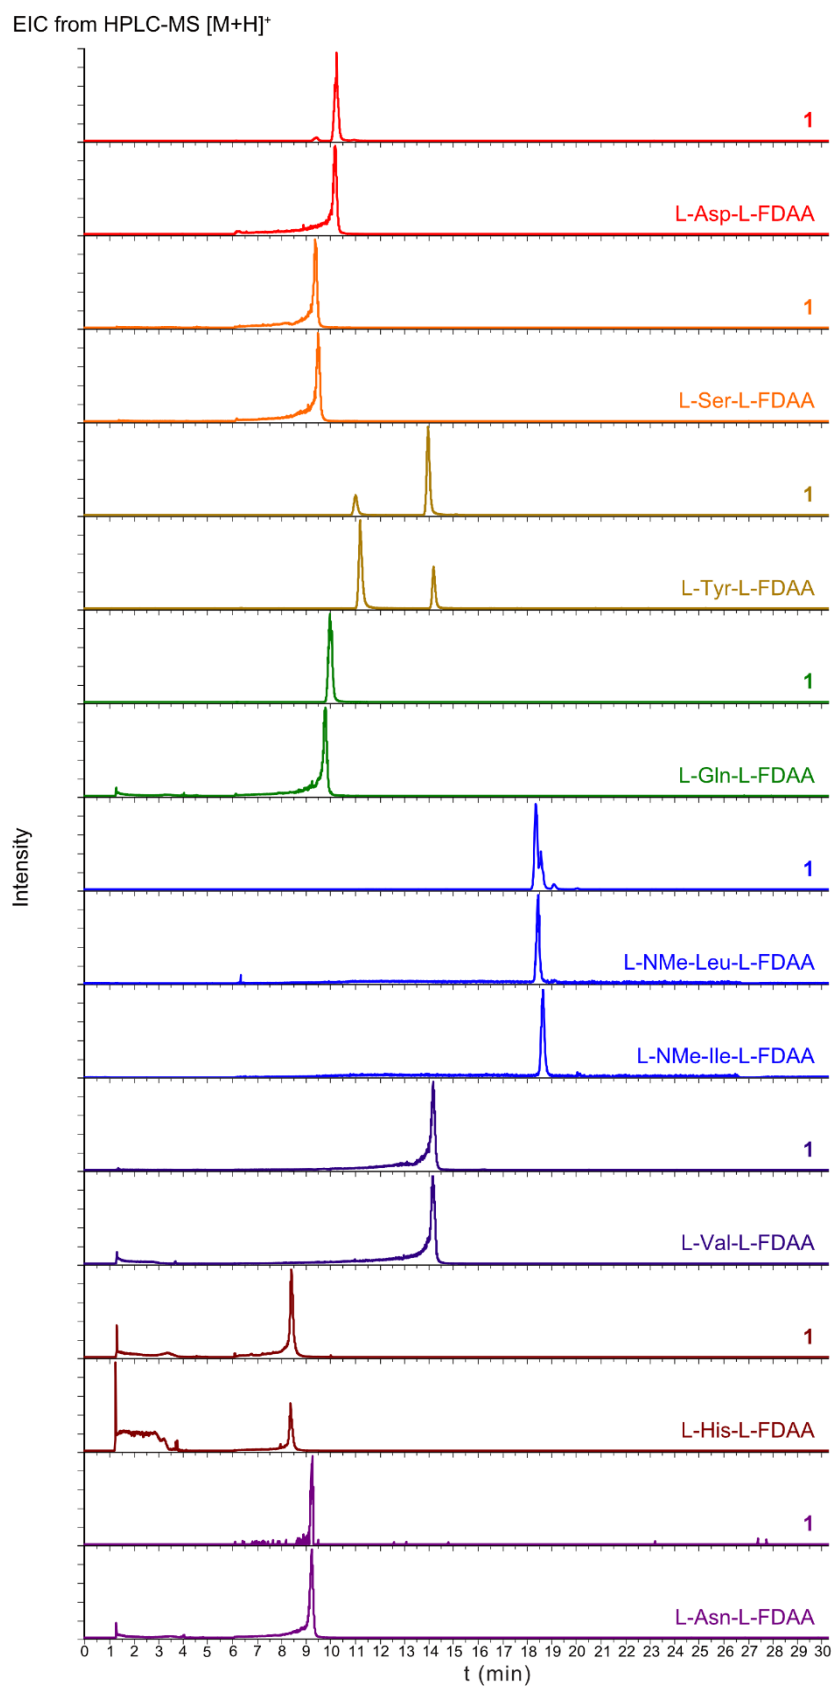

**Figure S11| Biological activity testing of 1.** Shewanellamide A was assayed against bacteria and yeast for a minimum inhibitory concentration. Under the conditions assayed, no growth inhibition was observed.

|                        | Tested strains                         | <b>1</b><br>MIC (μM) |
|------------------------|----------------------------------------|----------------------|
| yeast                  | <i>Saccharomyces cerevisiae</i> YPH499 | >50                  |
|                        | <i>Pichia pastoris</i> X-33            | >50                  |
| gram-negative bacteria | <i>Escherichia coli</i> TOP10          | >50                  |
|                        | <i>Pseudomonas putida</i> KT2440       | >50                  |
|                        | <i>Shewanella oneidensis</i> MR-1      | >50                  |
| gram-positive          | <i>Bacillus subtilis</i> WB800N        | >50                  |
